# Supplementary material for: Design and synthesis of sugar-triazole low molecular weight gels as mercury ion sensor
Source: Royal Society of Chemistry journal article supplement (doi:10.1039/c3nj00072a), 2013-01-01
Supplement: c3nj00072a.pdf [file c3nj00072a.pdf]

# Design and Synthesis of sugar-triazole low molecular weight gels as merucury ion sensor

Arasappan Hemamalini and Thangamuthu Mohan Das\*

Department of Organic Chemistry, University of Madras, Guindy Campus, Chennai – 600 025,  
INDIA; Fax +91-44-22352494; E-mail: tmdas\_72@yahoo.com.

## NMR Spectras:

### <sup>1</sup>H NMR spectra of compound 1

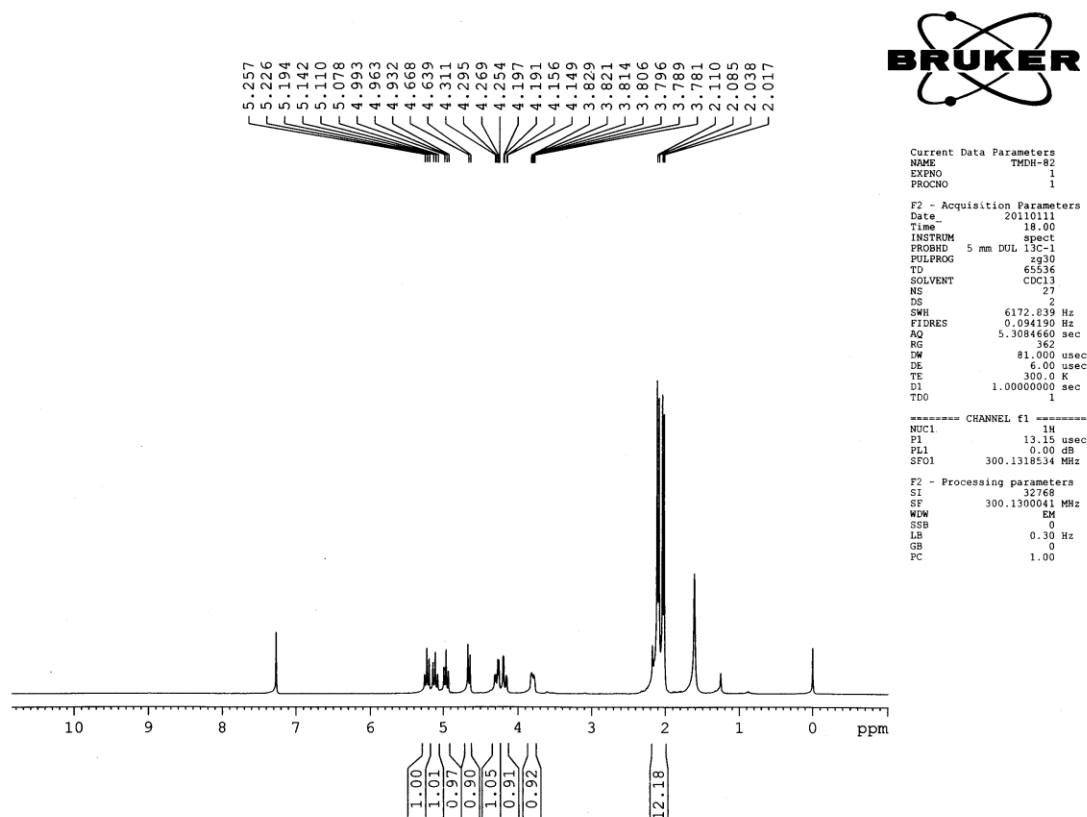

# <sup>13</sup>C NMR spectra of compound 1

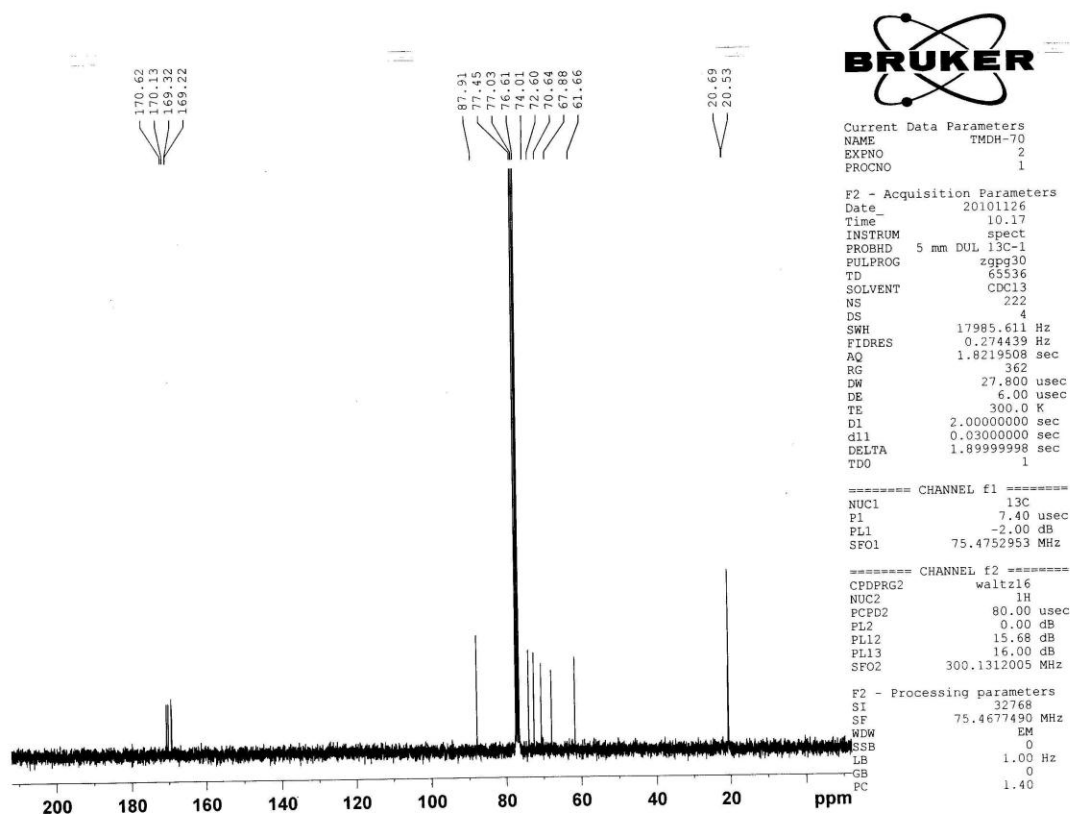

<sup>1</sup>H NMR spectra of compound 2a

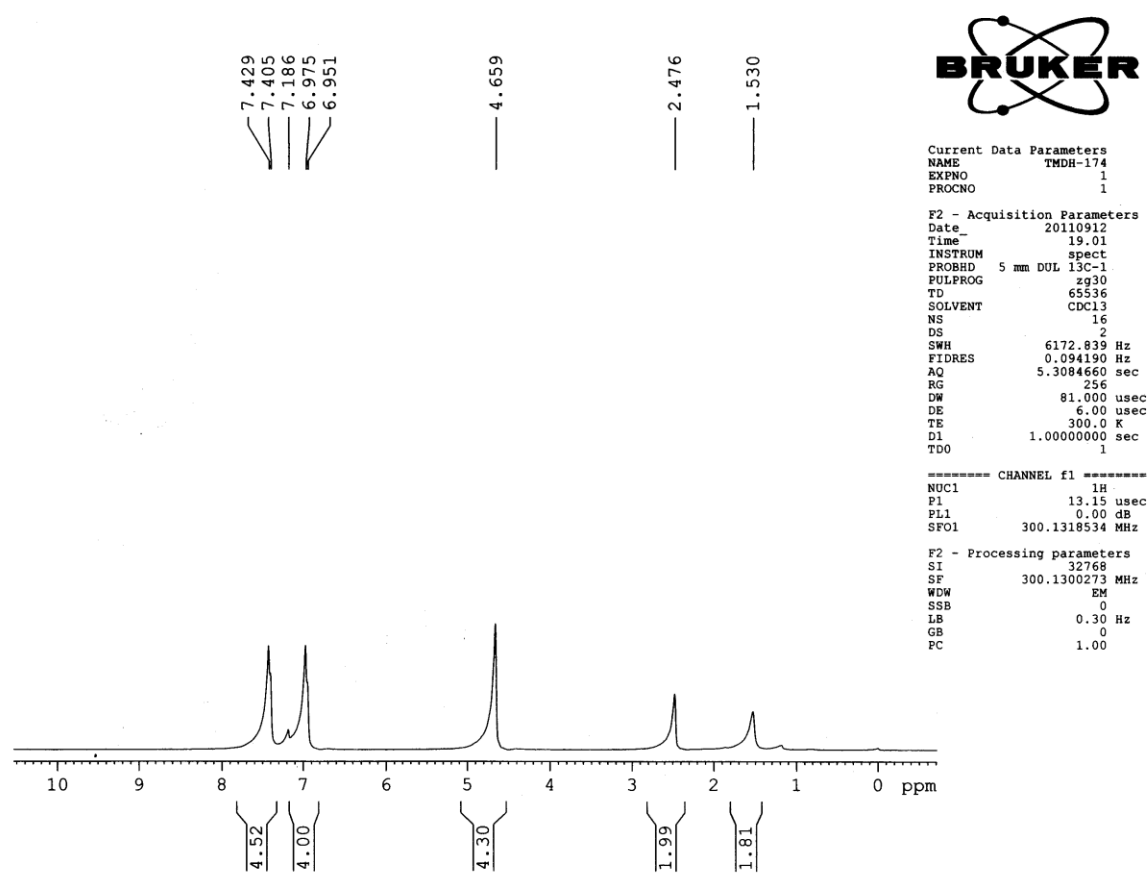

<sup>13</sup>C NMR spectra of compound 2a

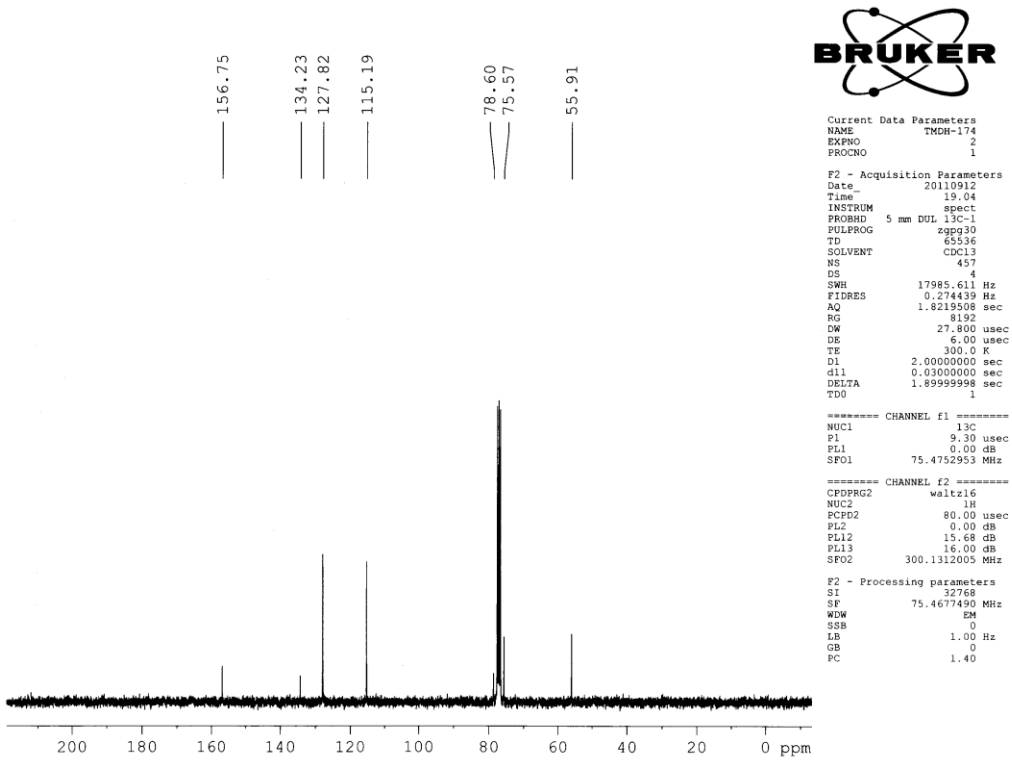

<sup>1</sup>H NMR spectra of compound 3a

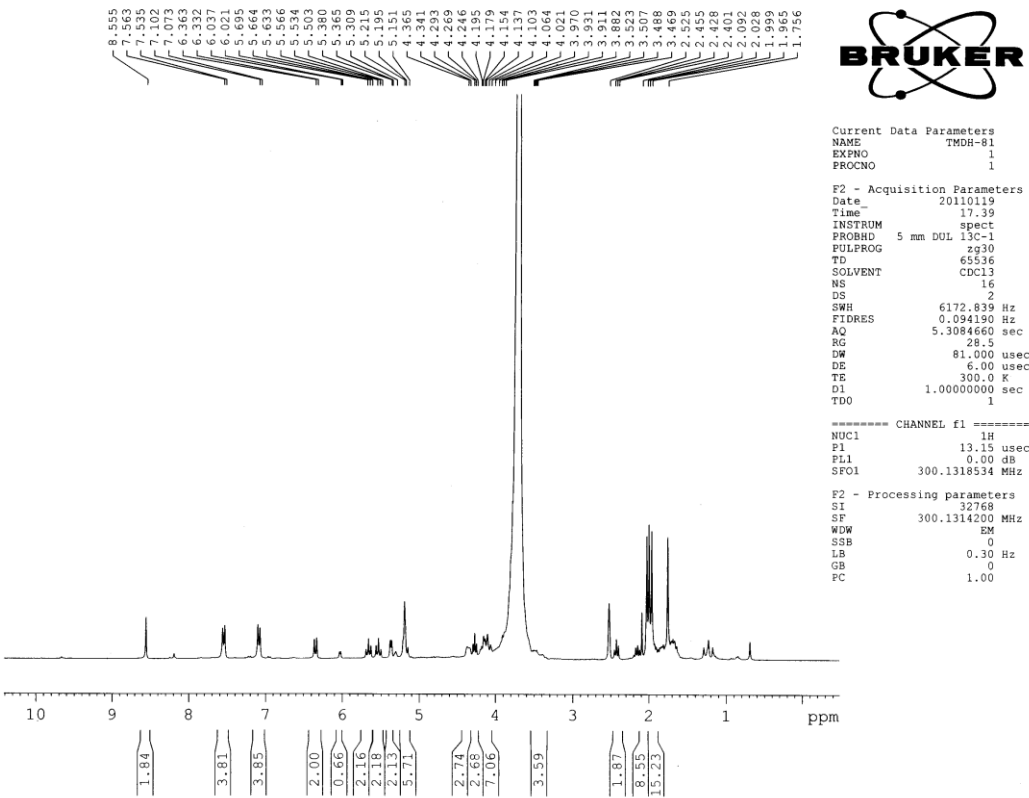

<sup>13</sup>C NMR spectra of compound 3a

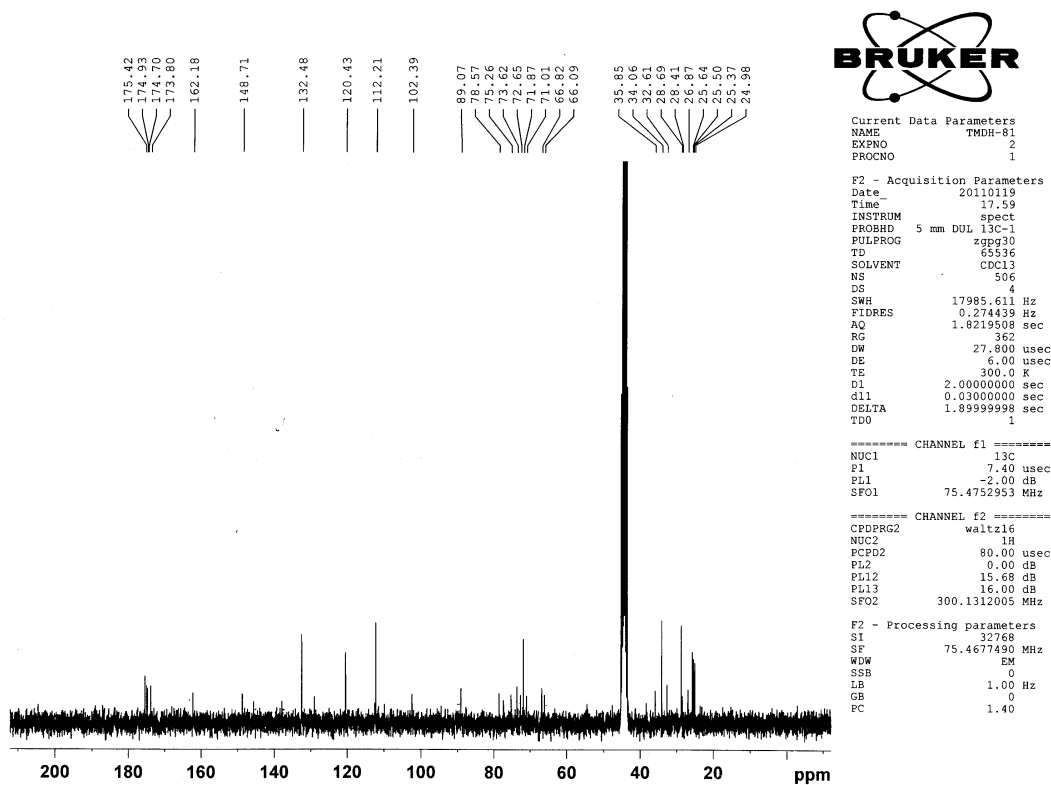

# <sup>1</sup>H NMR spectra of compound 2b

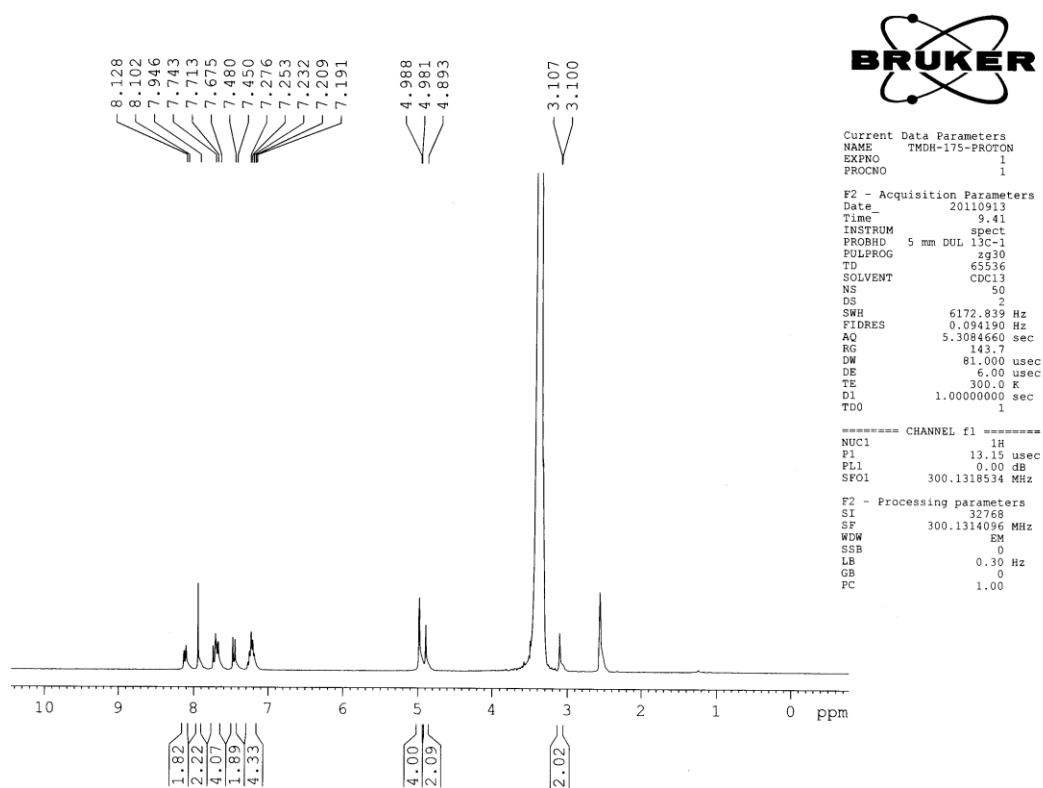

<sup>13</sup>C NMR spectra of compound 2b

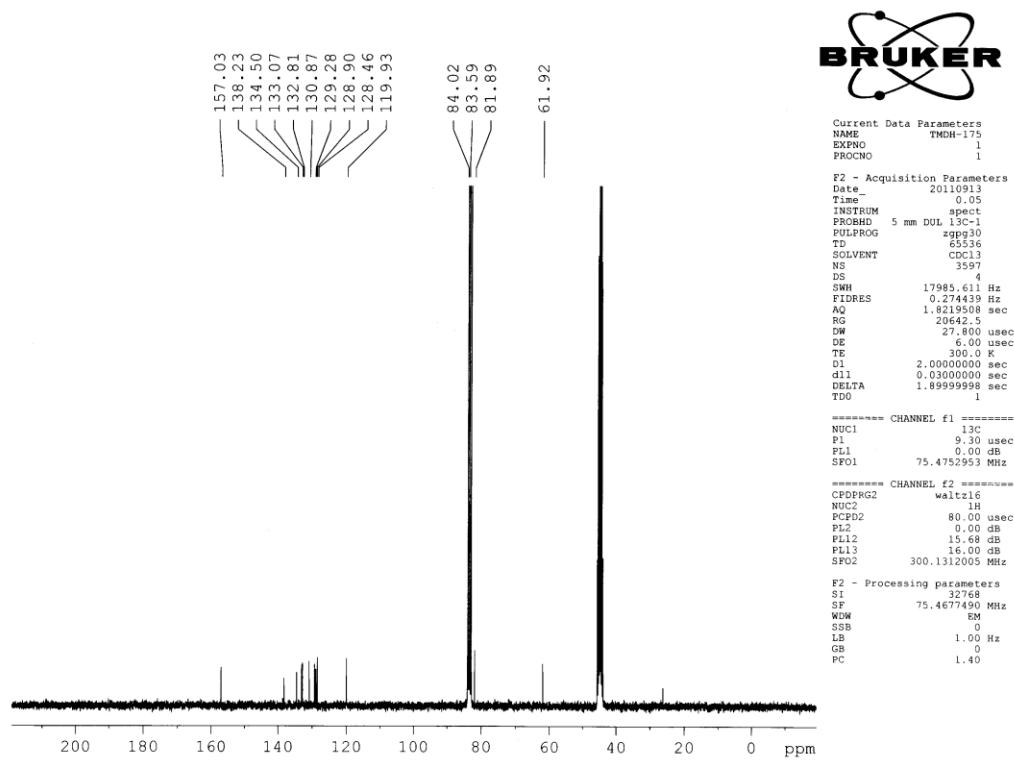

# <sup>1</sup>H NMR spectra of compound 3b

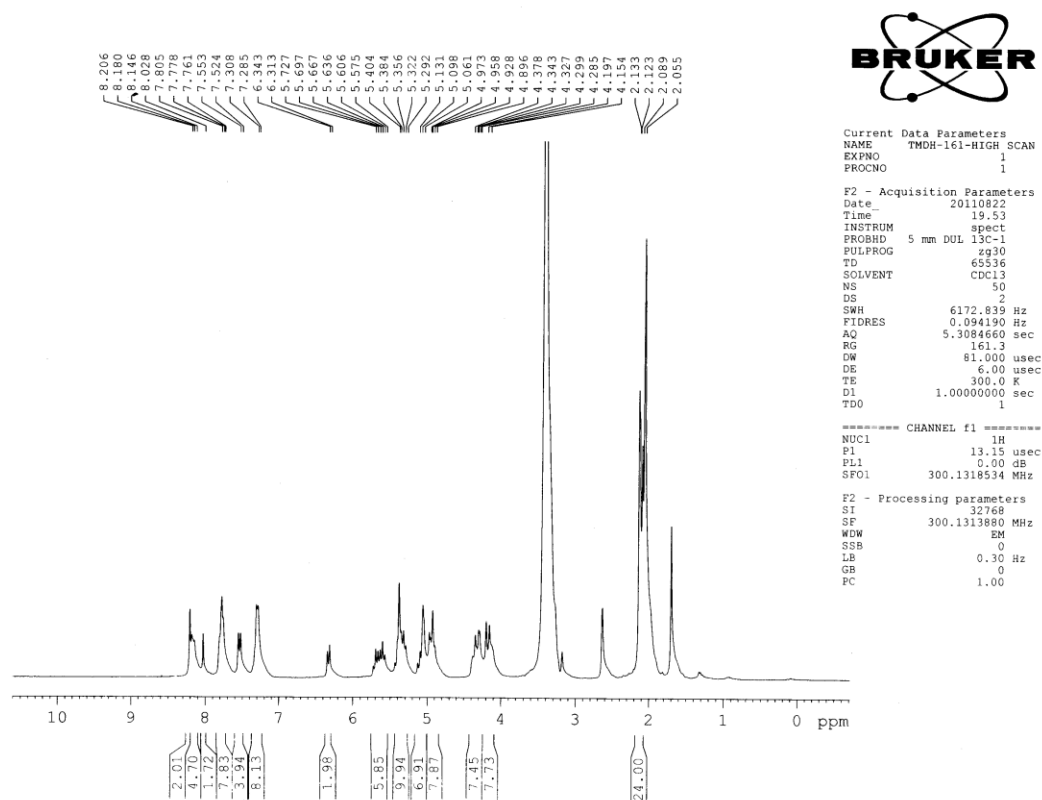

<sup>13</sup>C NMR spectra of compound 3b

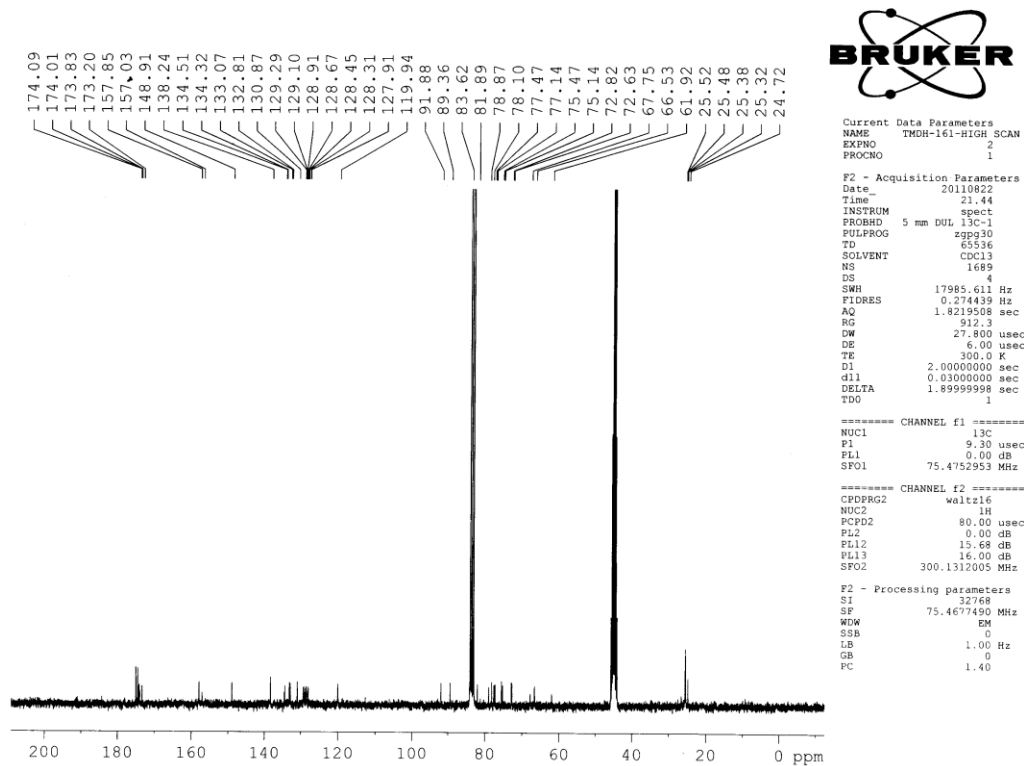

# <sup>1</sup>H NMR spectra of compound 2c

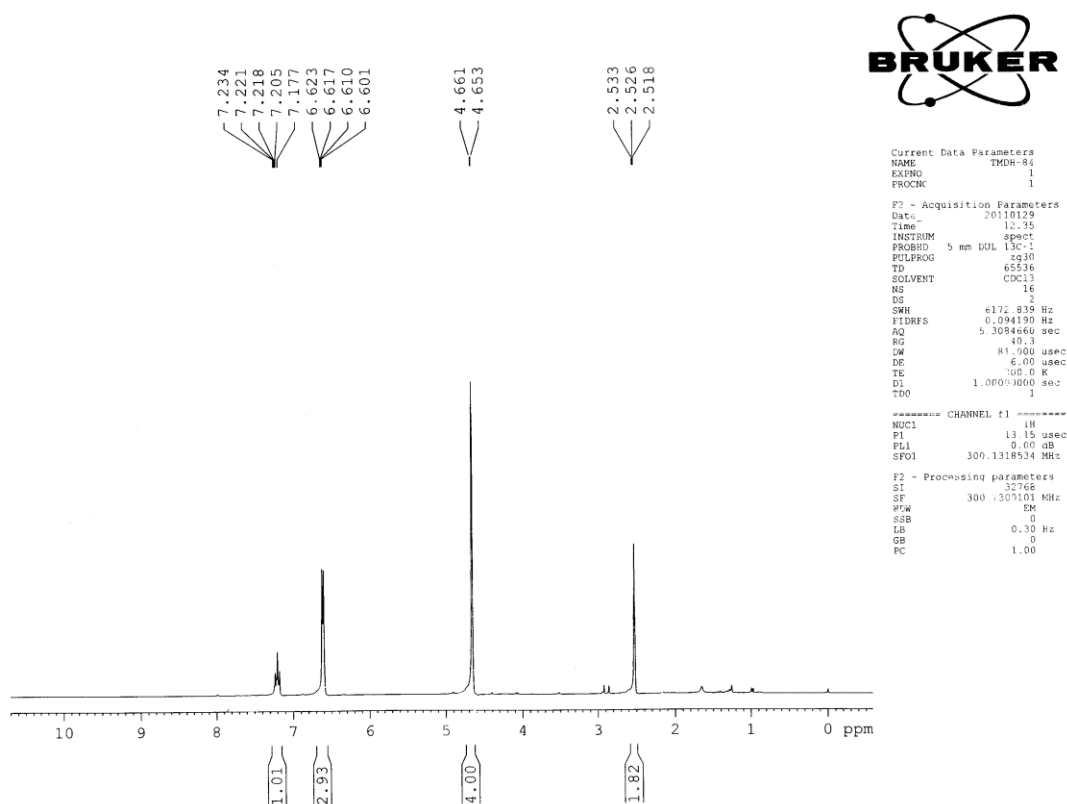

# <sup>13</sup>C NMR spectra of compound 2c

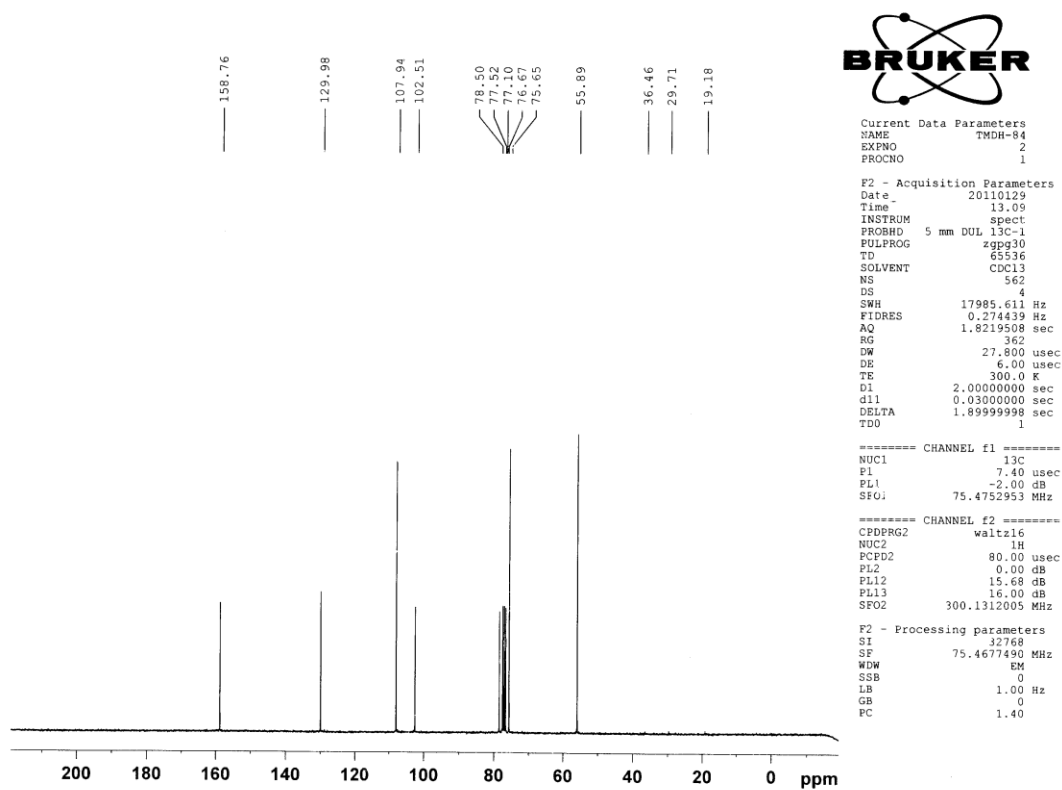

<sup>1</sup>H NMR spectra of compound 3c

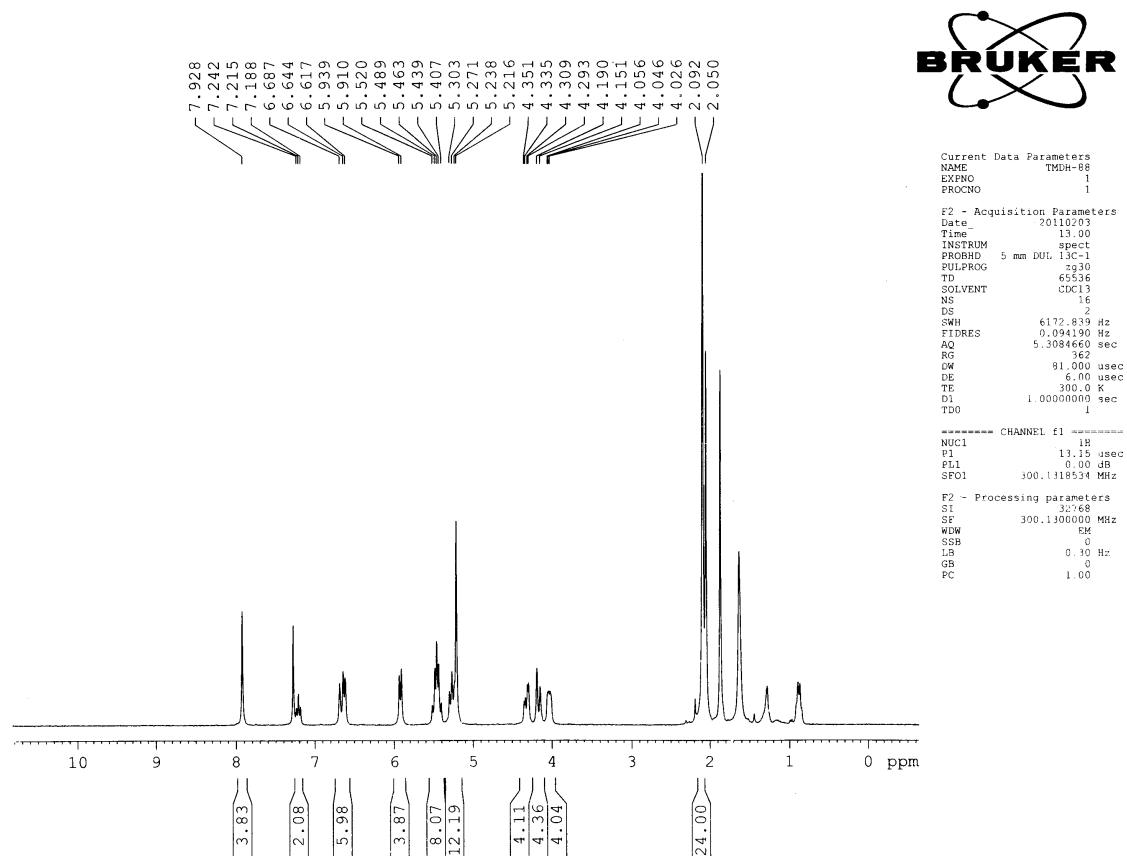

# <sup>13</sup>C NMR spectra of compound 3c

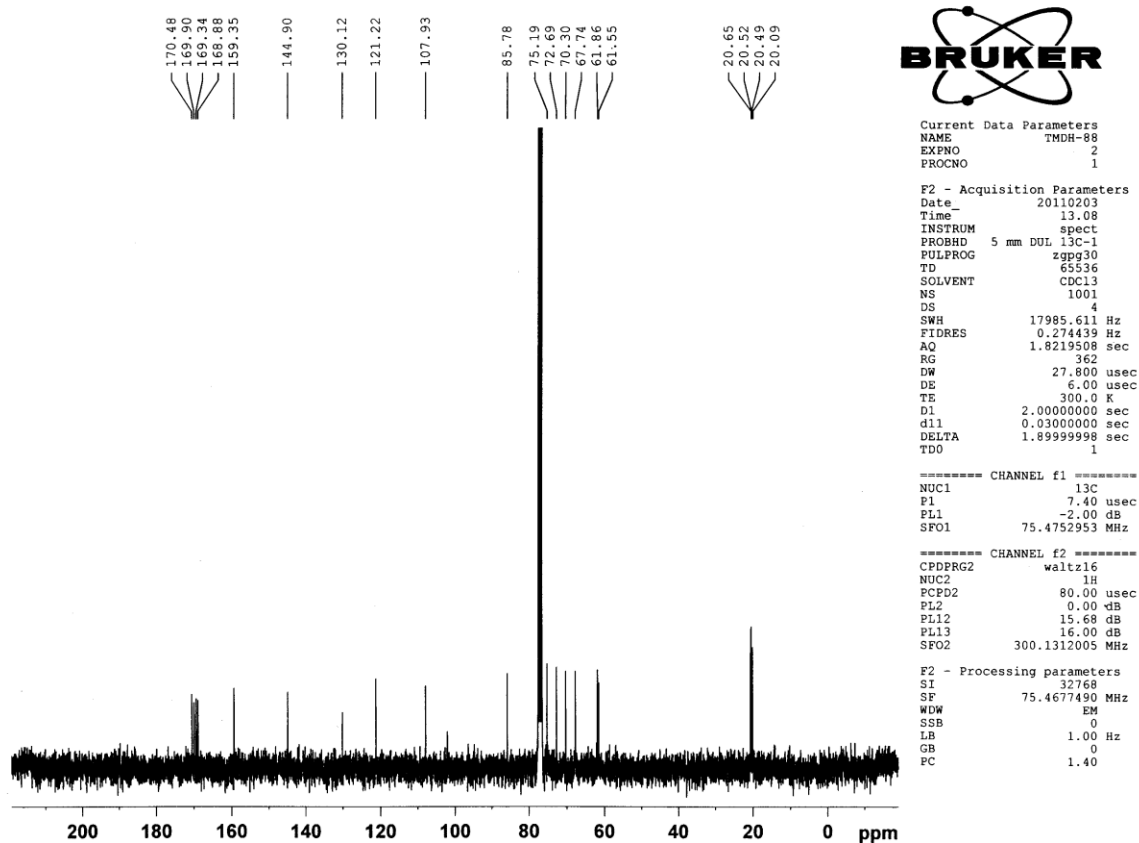

# <sup>1</sup>H NMR spectra of compound 2d

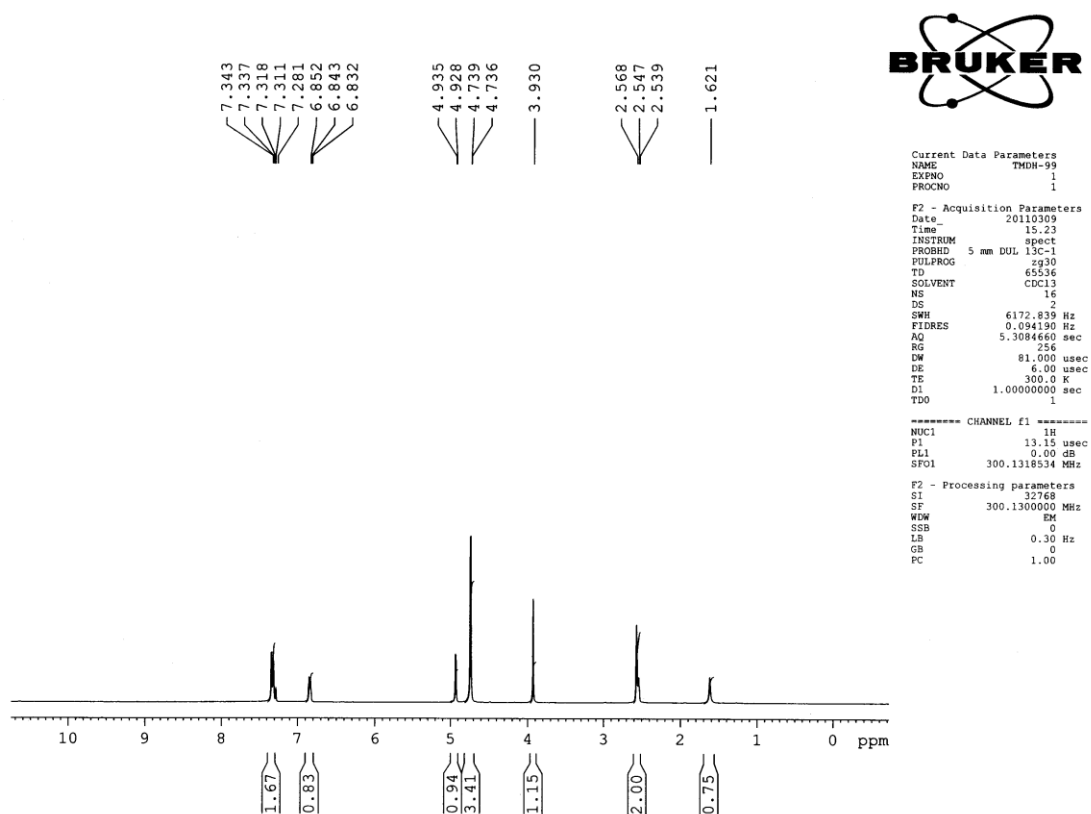

# <sup>13</sup>C NMR spectra of compound 2d

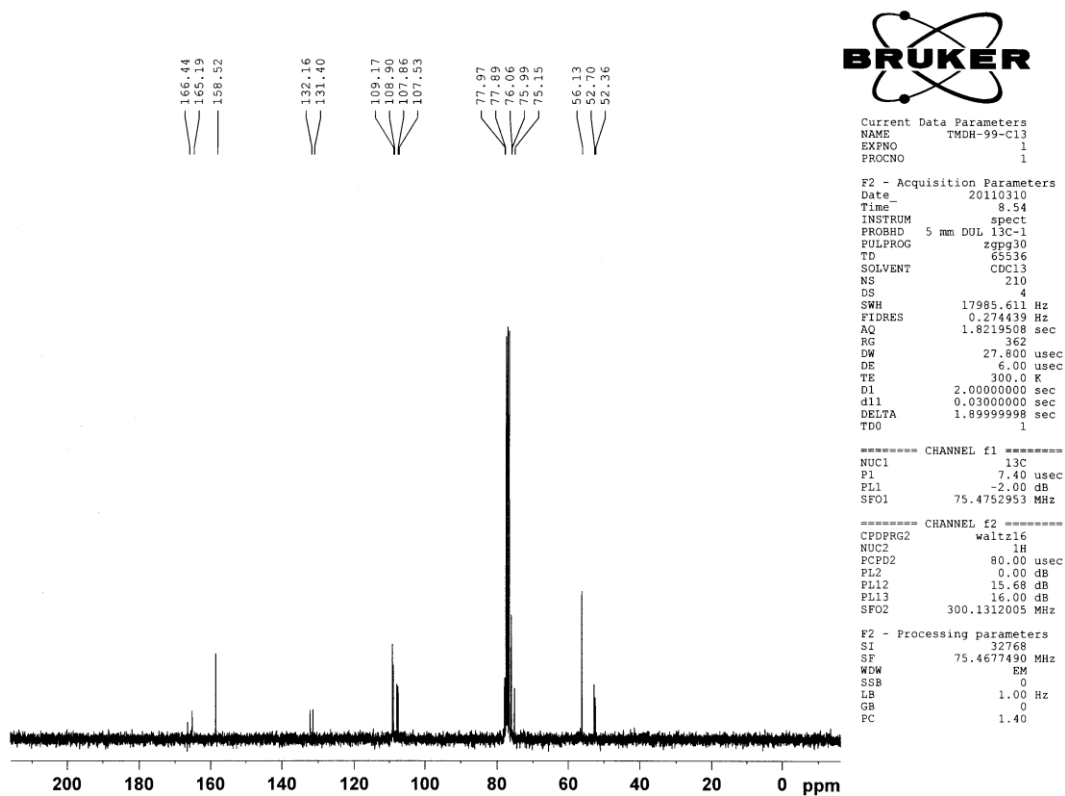

<sup>1</sup>H NMR spectra of compound 3d

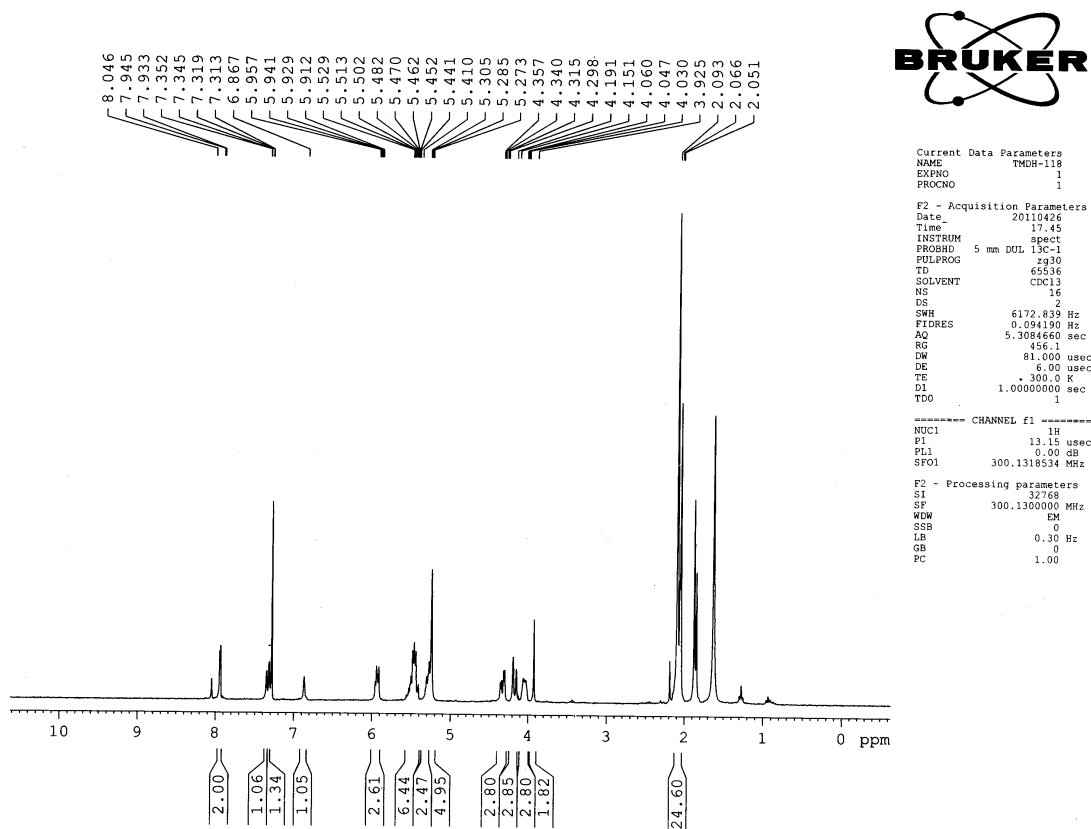

<sup>13</sup>C NMR spectra of compound 3d

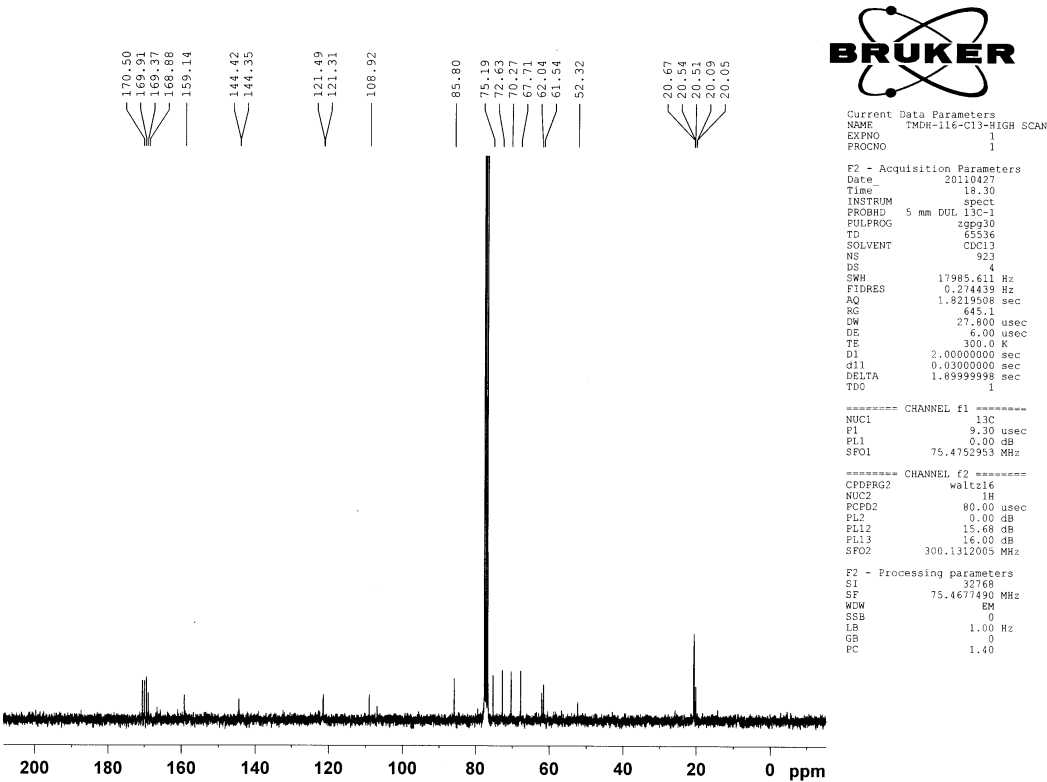

<sup>1</sup>H NMR spectra of compound 2e

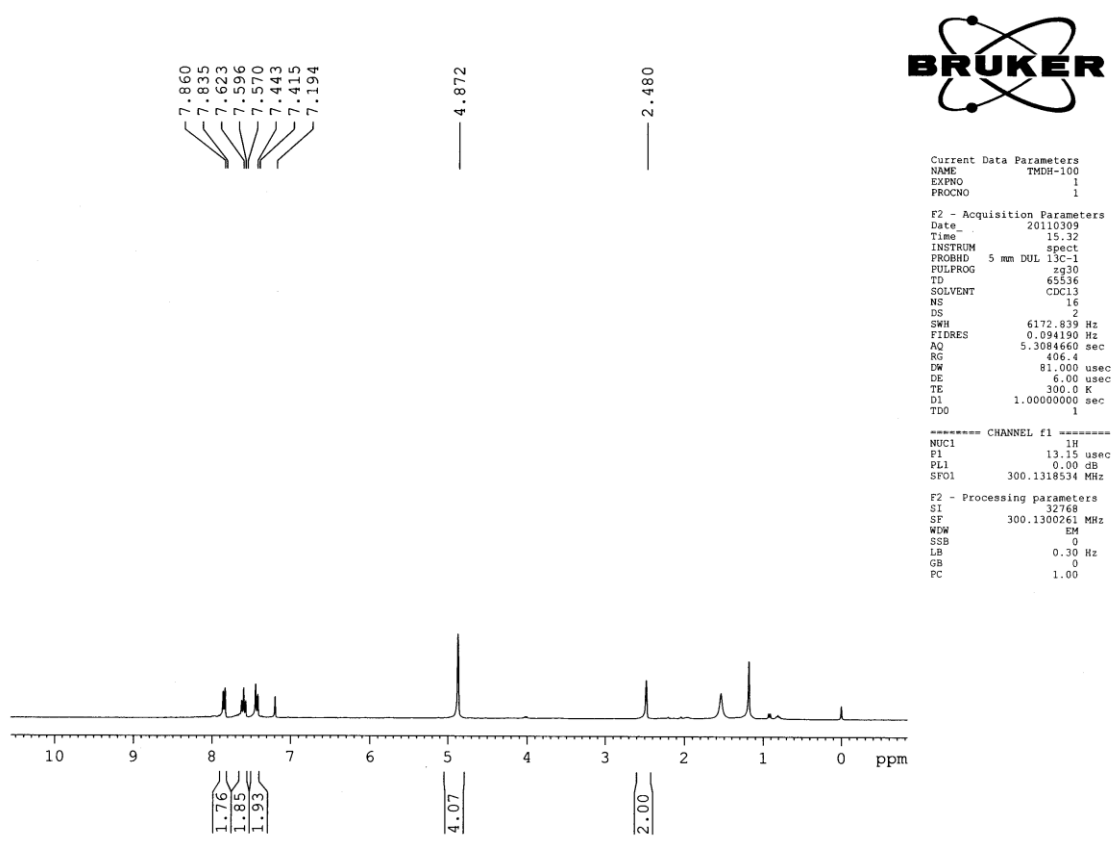

<sup>13</sup>C NMR spectra of compound 2e

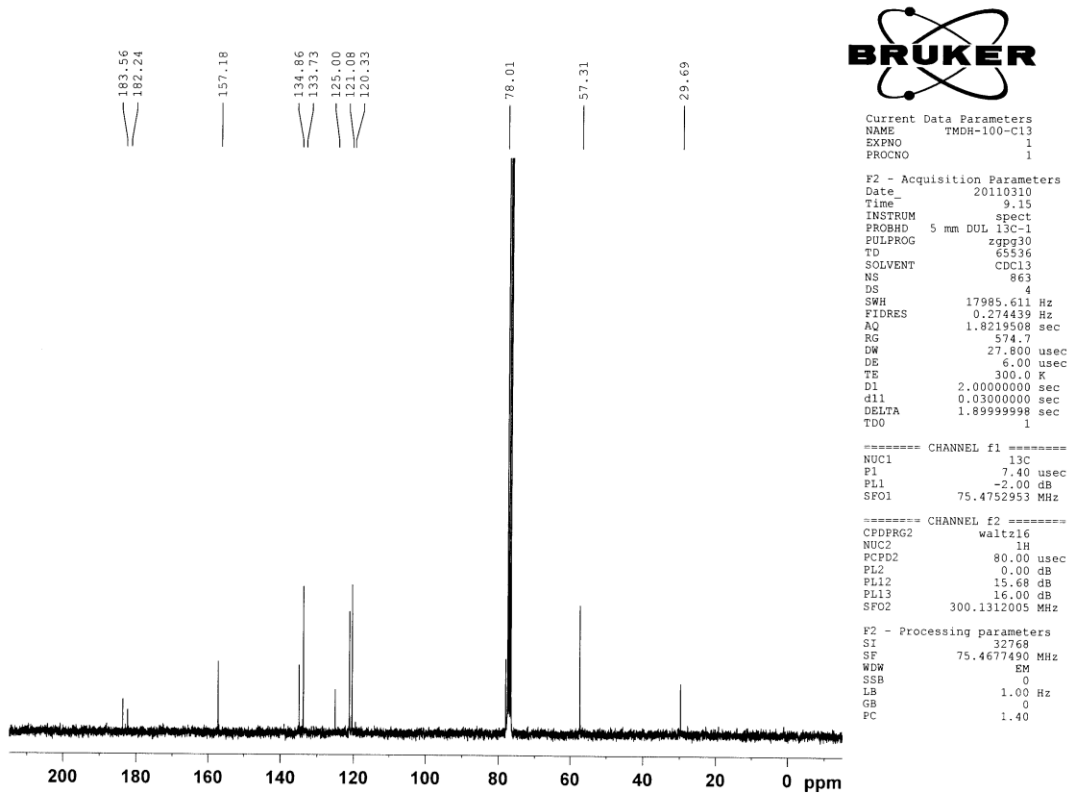

<sup>1</sup>H NMR spectra of compound 3e

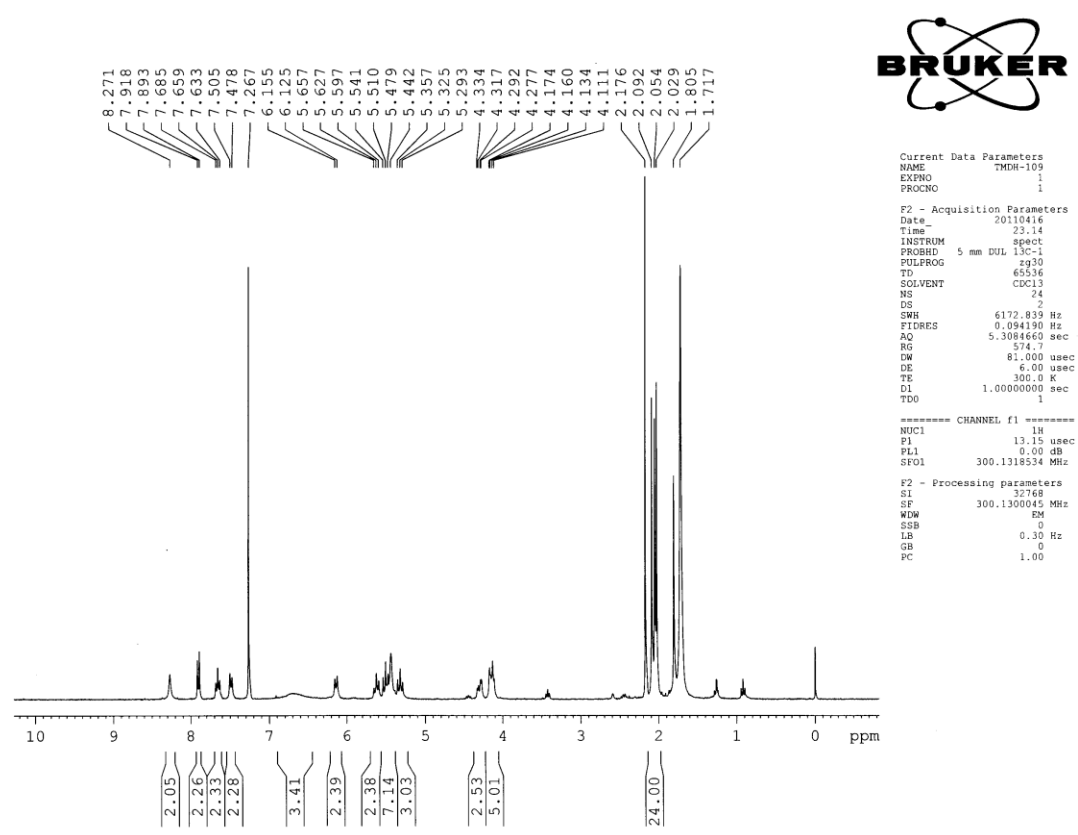

<sup>13</sup>C NMR spectra of compound 3e

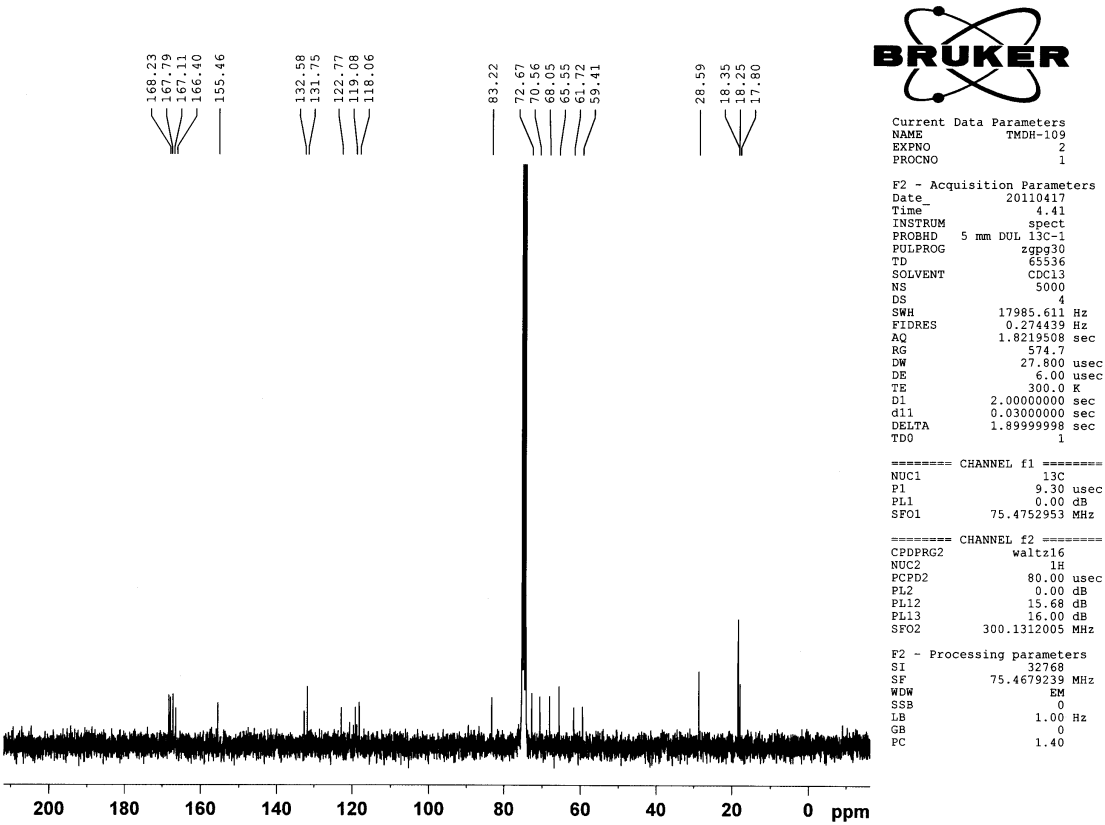

<sup>1</sup>H NMR spectra of compound 2f

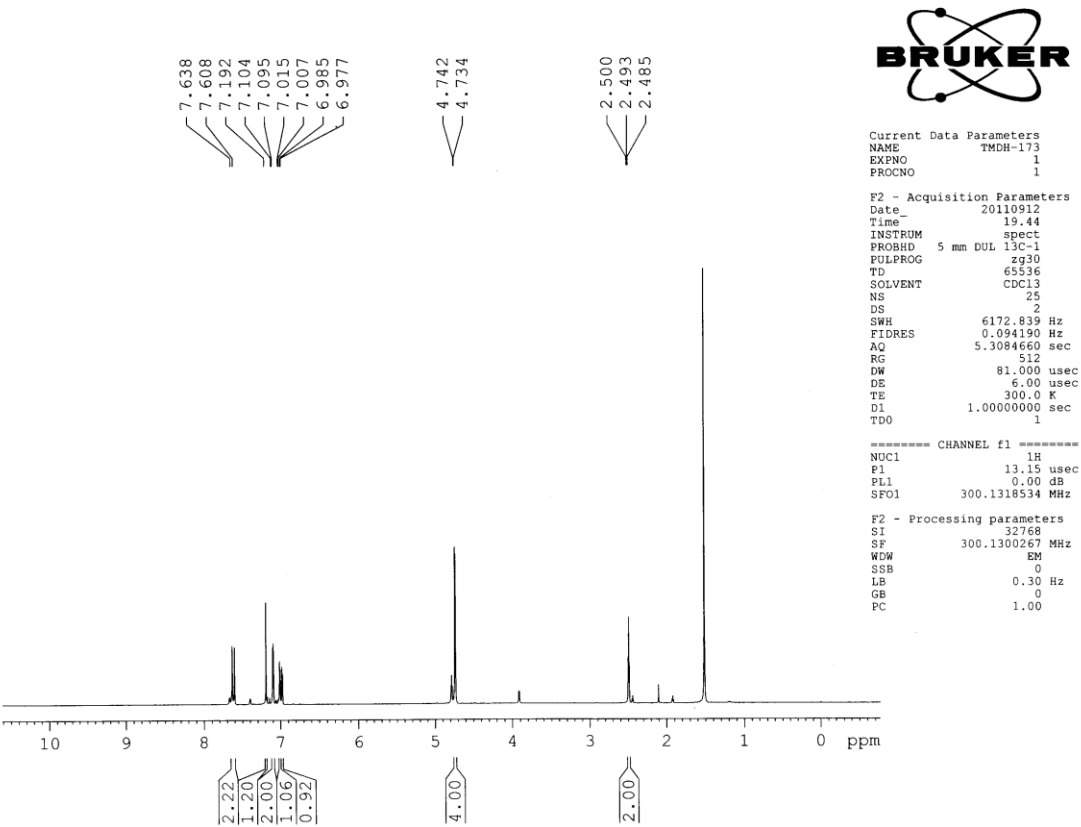

<sup>13</sup>C NMR spectra of compound 2f

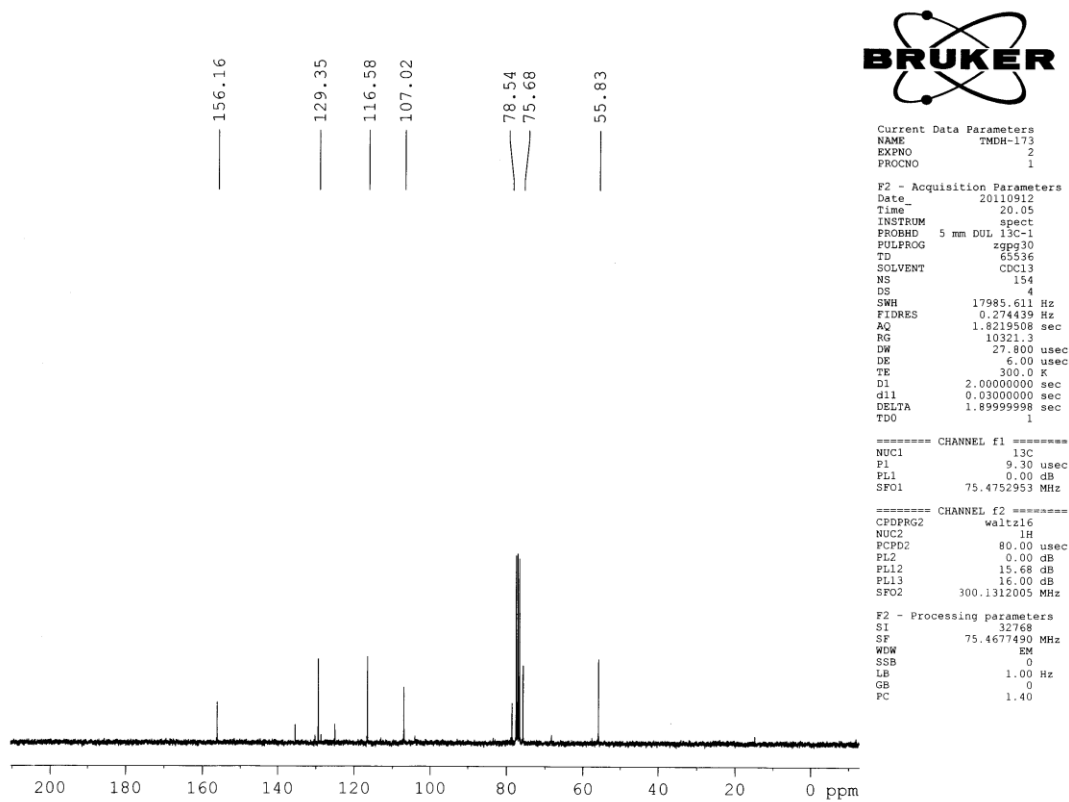

<sup>1</sup>H NMR spectra of compound 3f

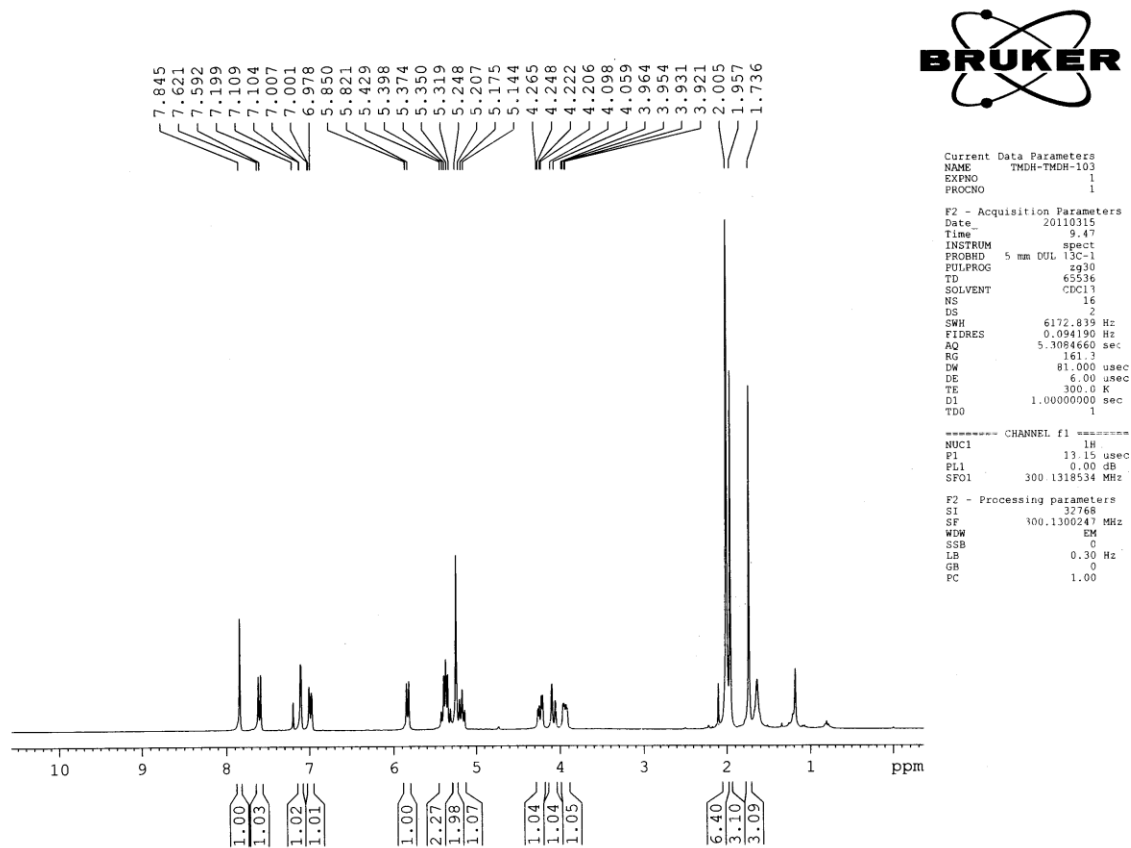

<sup>13</sup>C NMR spectra of compound 3f

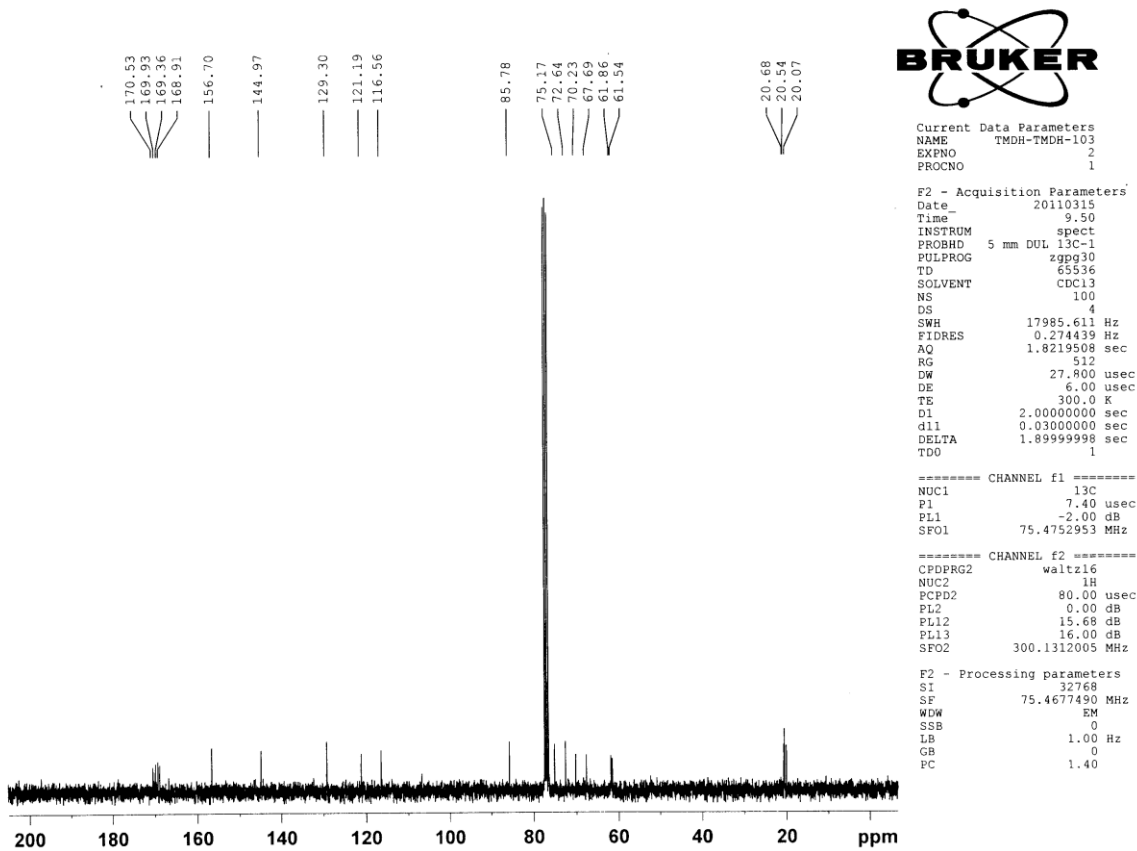

# <sup>1</sup>H-<sup>1</sup>H COSY spectra of compound 3f

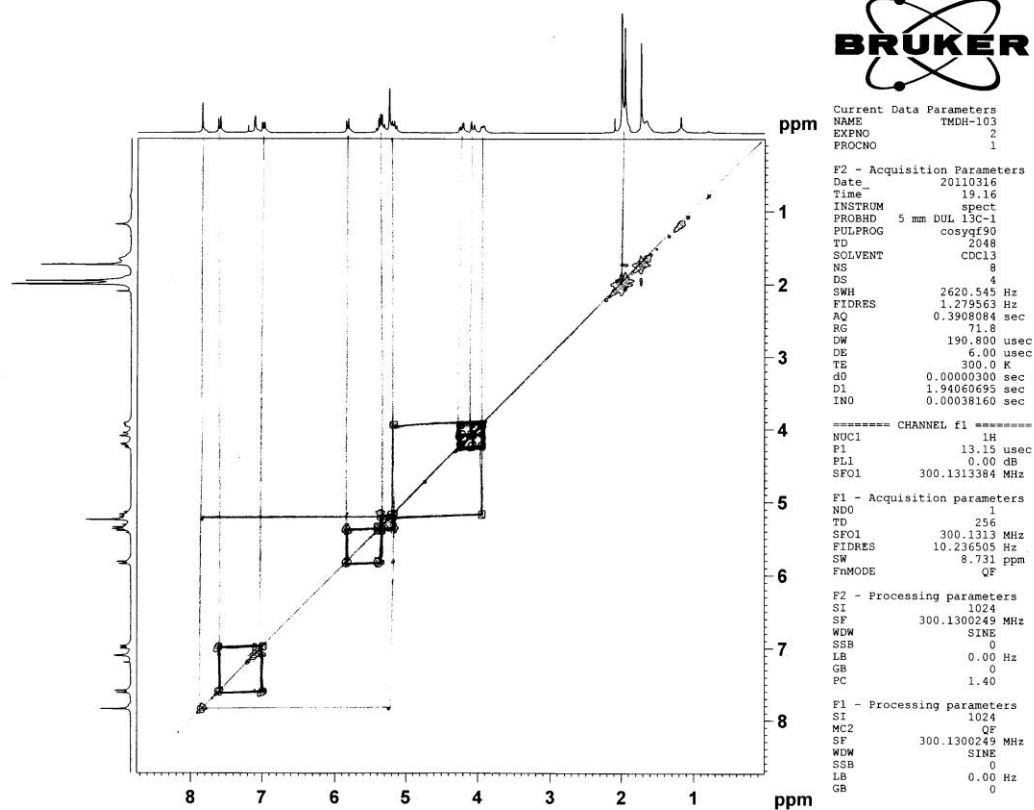

# $^1\text{H}$ - $^{13}\text{C}$ COSY spectra of compound 3f

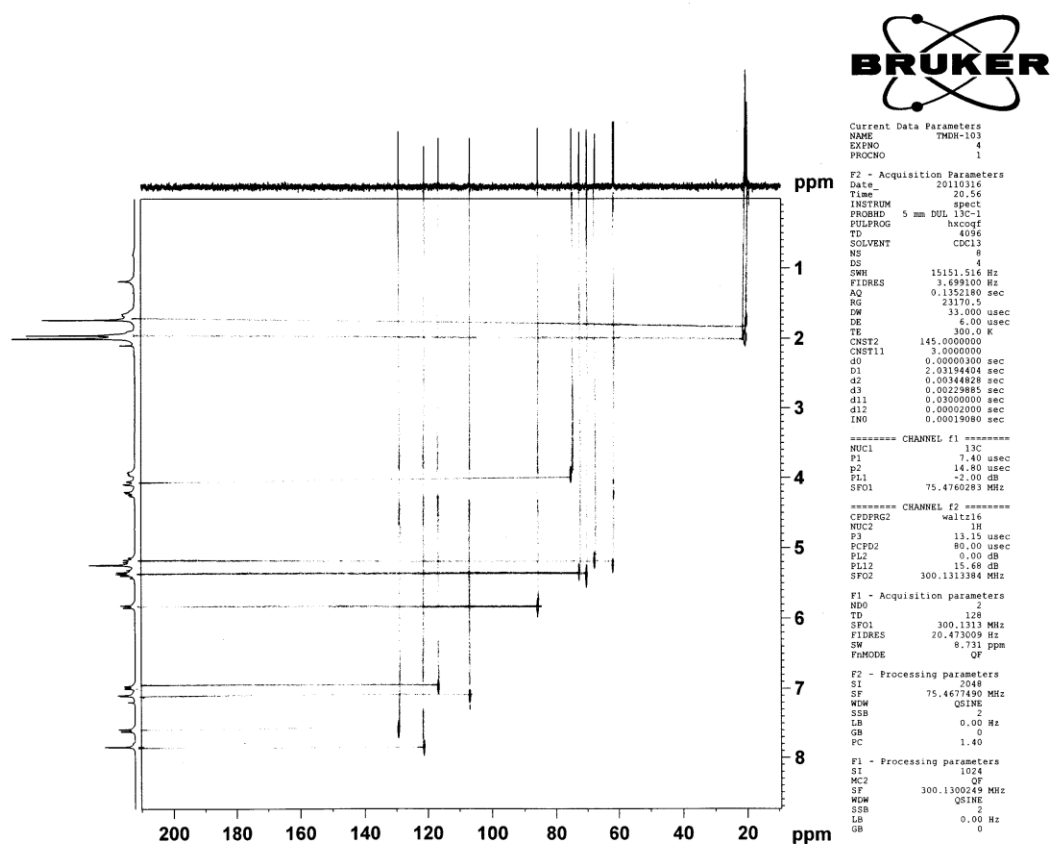

DEPT-45 spectra of compound 3f

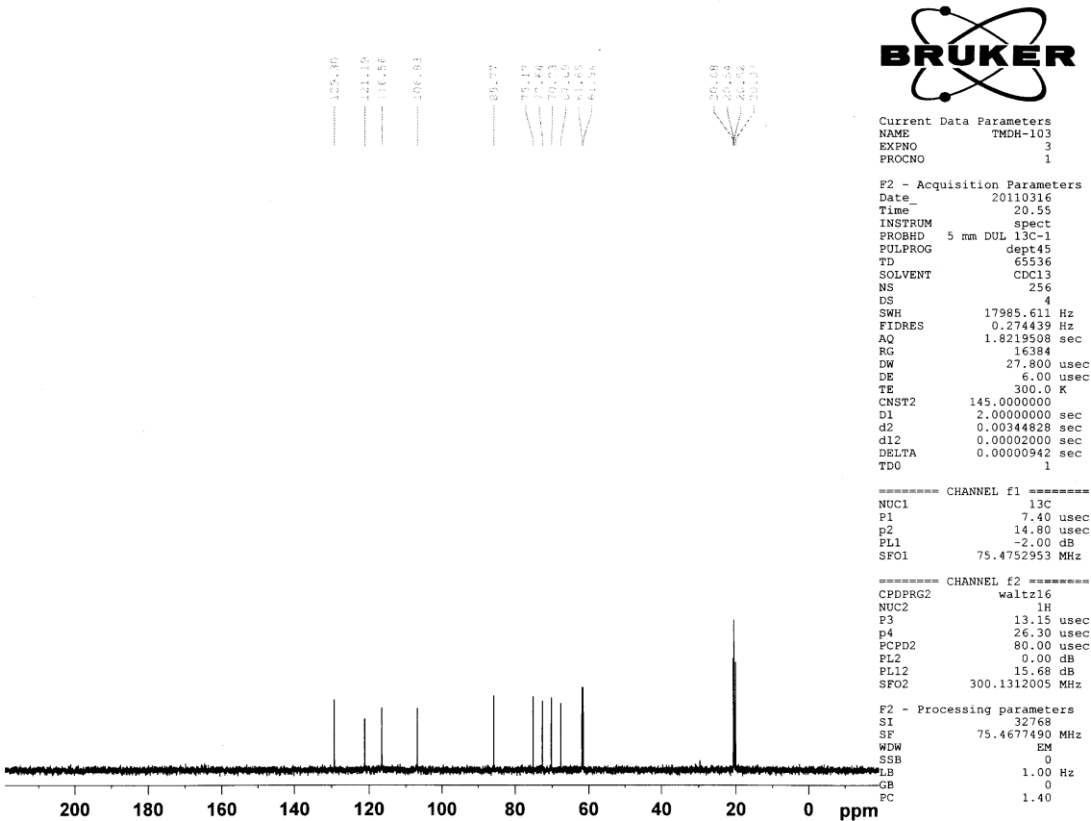

DEPT-135 spectra of compound 3f

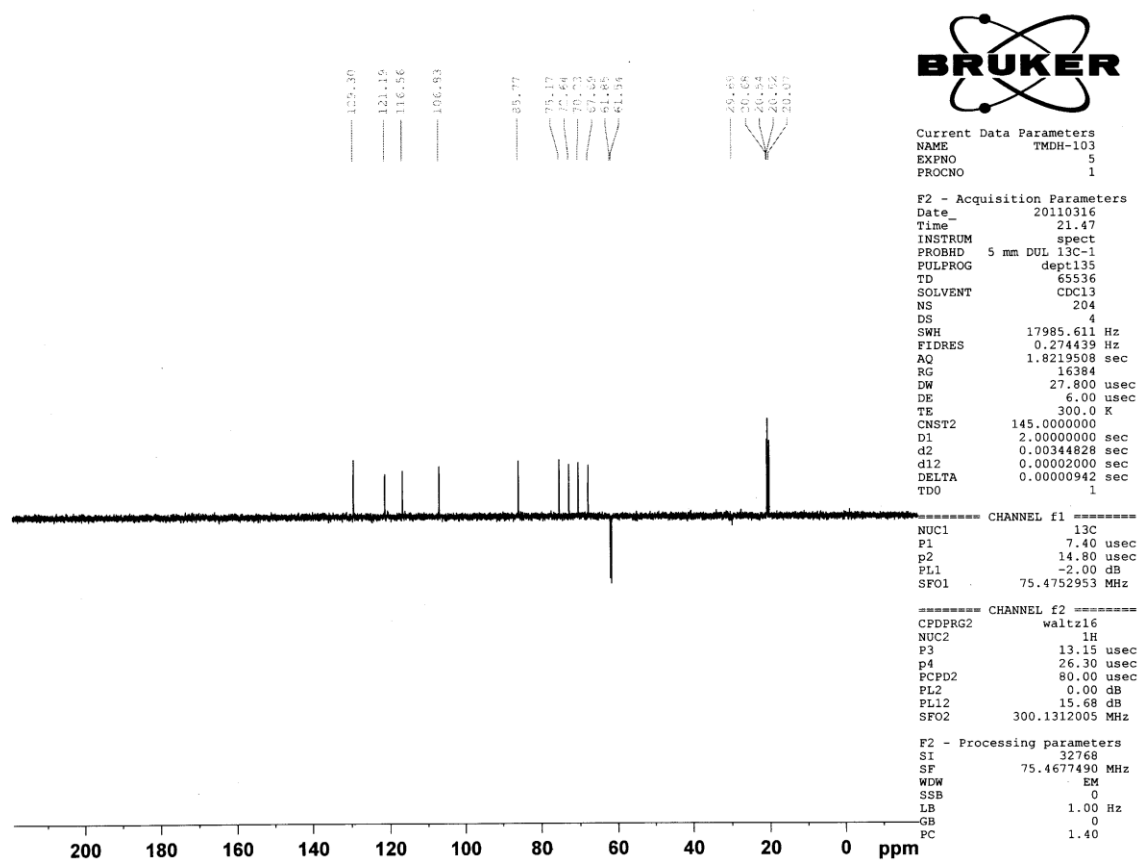

ESI-Mass spectra of compound of compound 3b

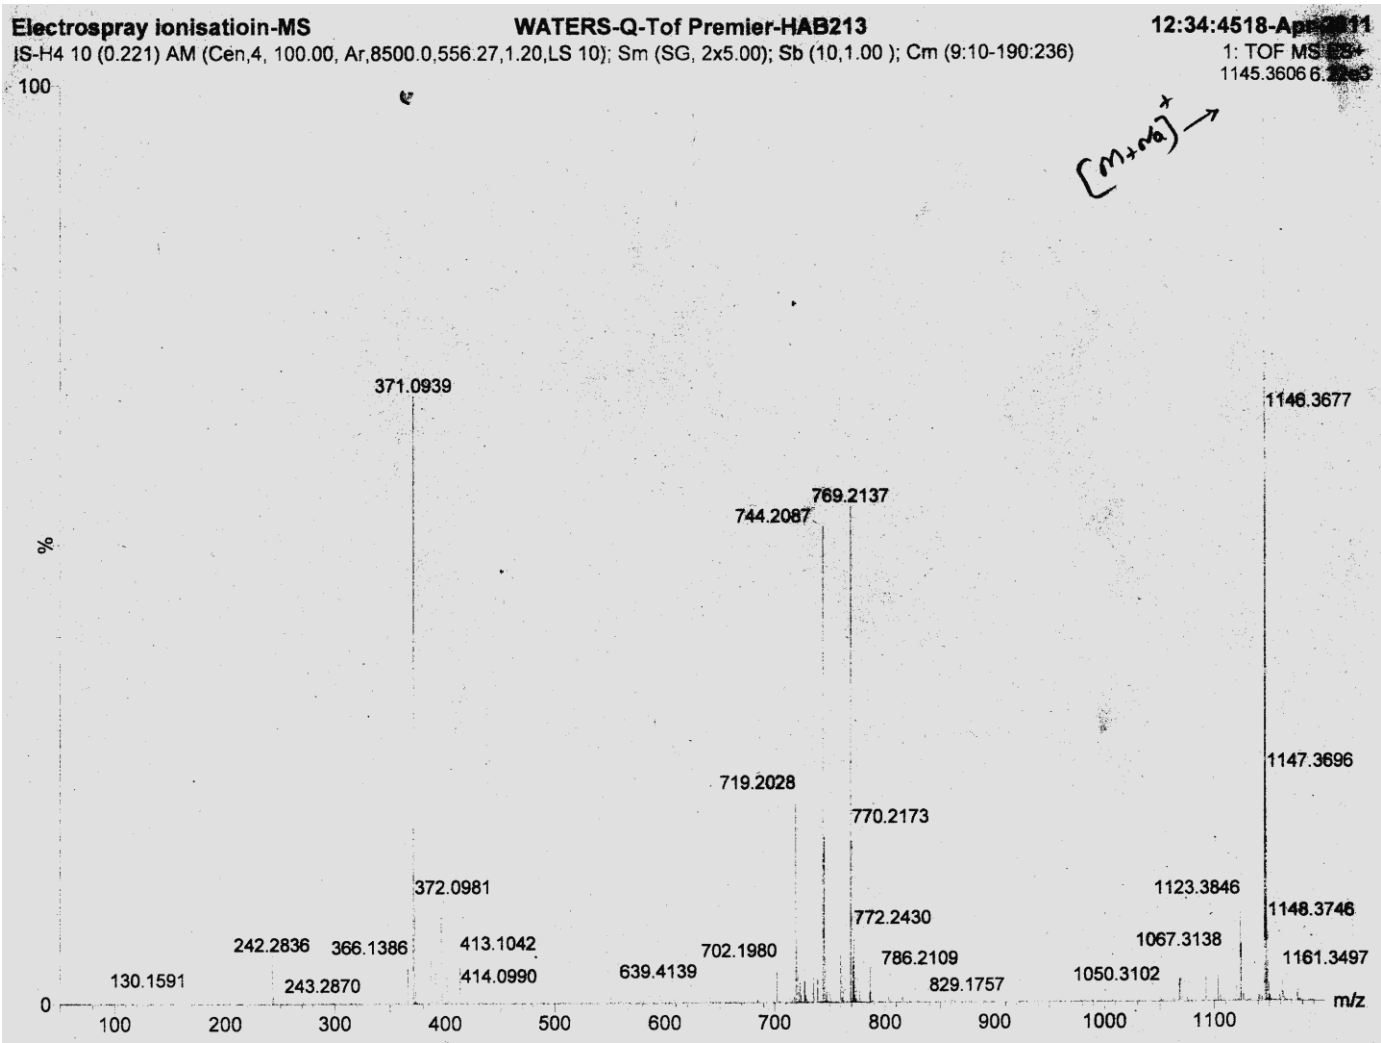

ESI-Mass spectra of compound 3c

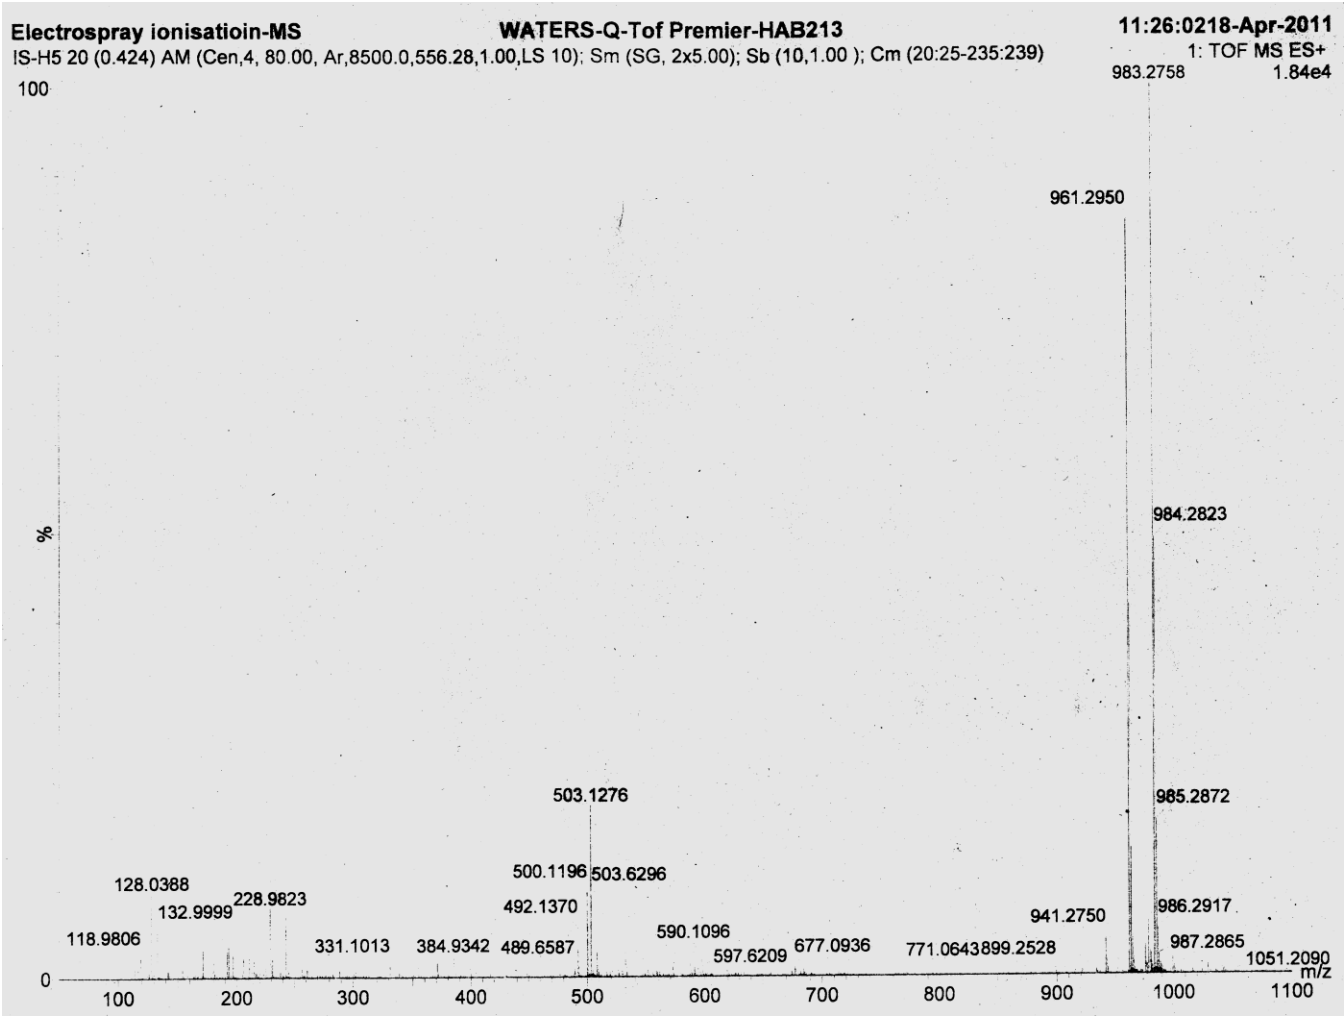

ESI-Mass spectra of compound 3d

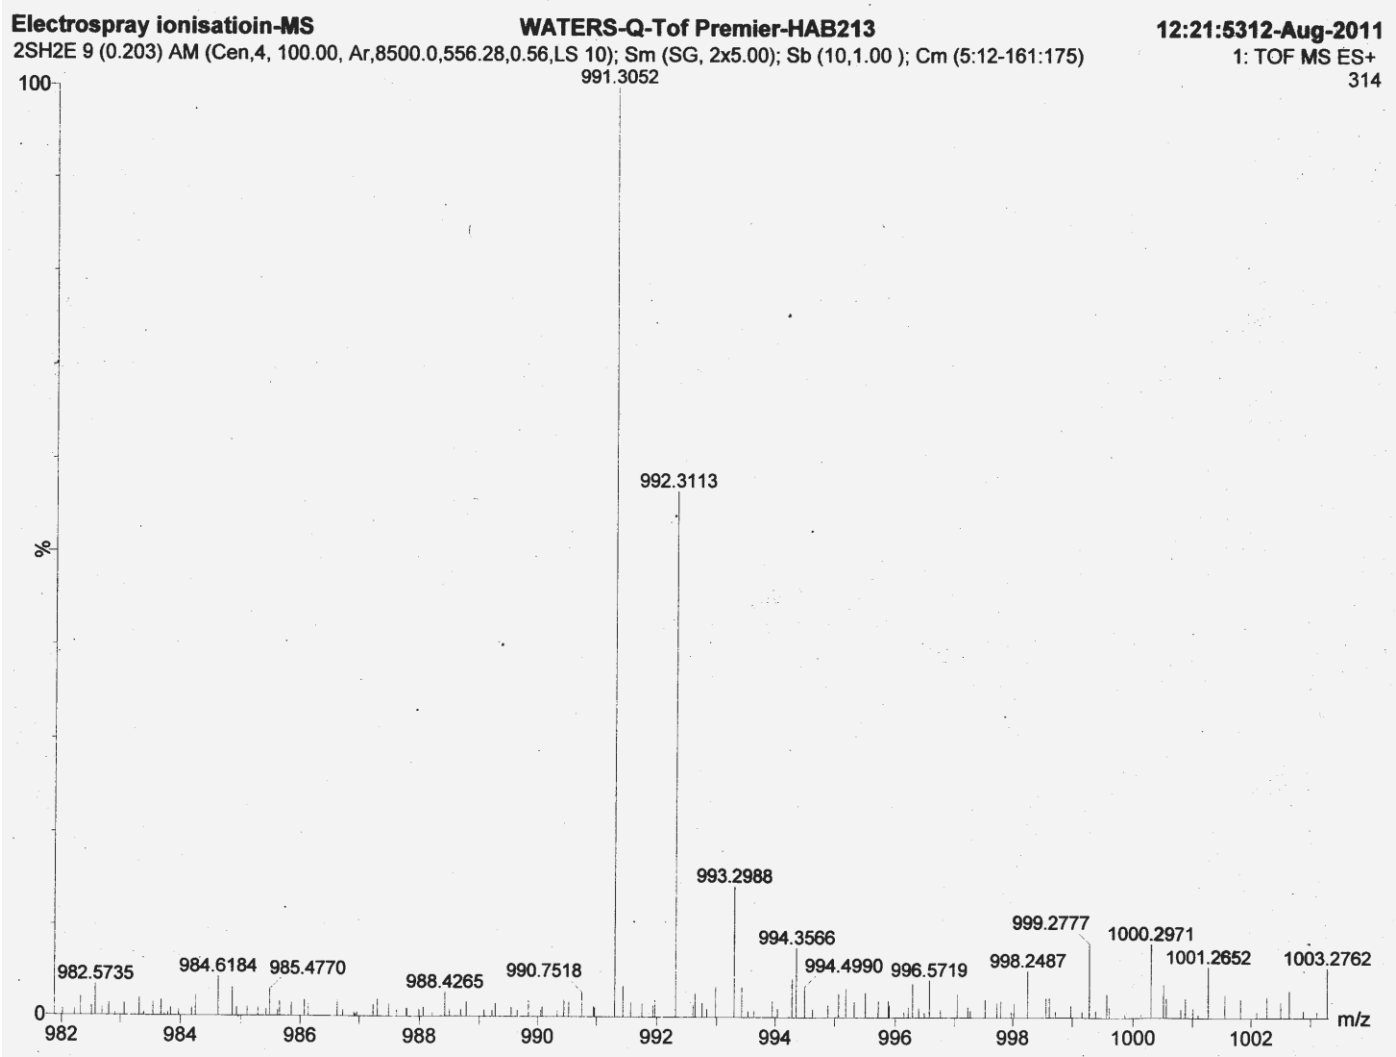

ESI-Mass spectra of compound 3f

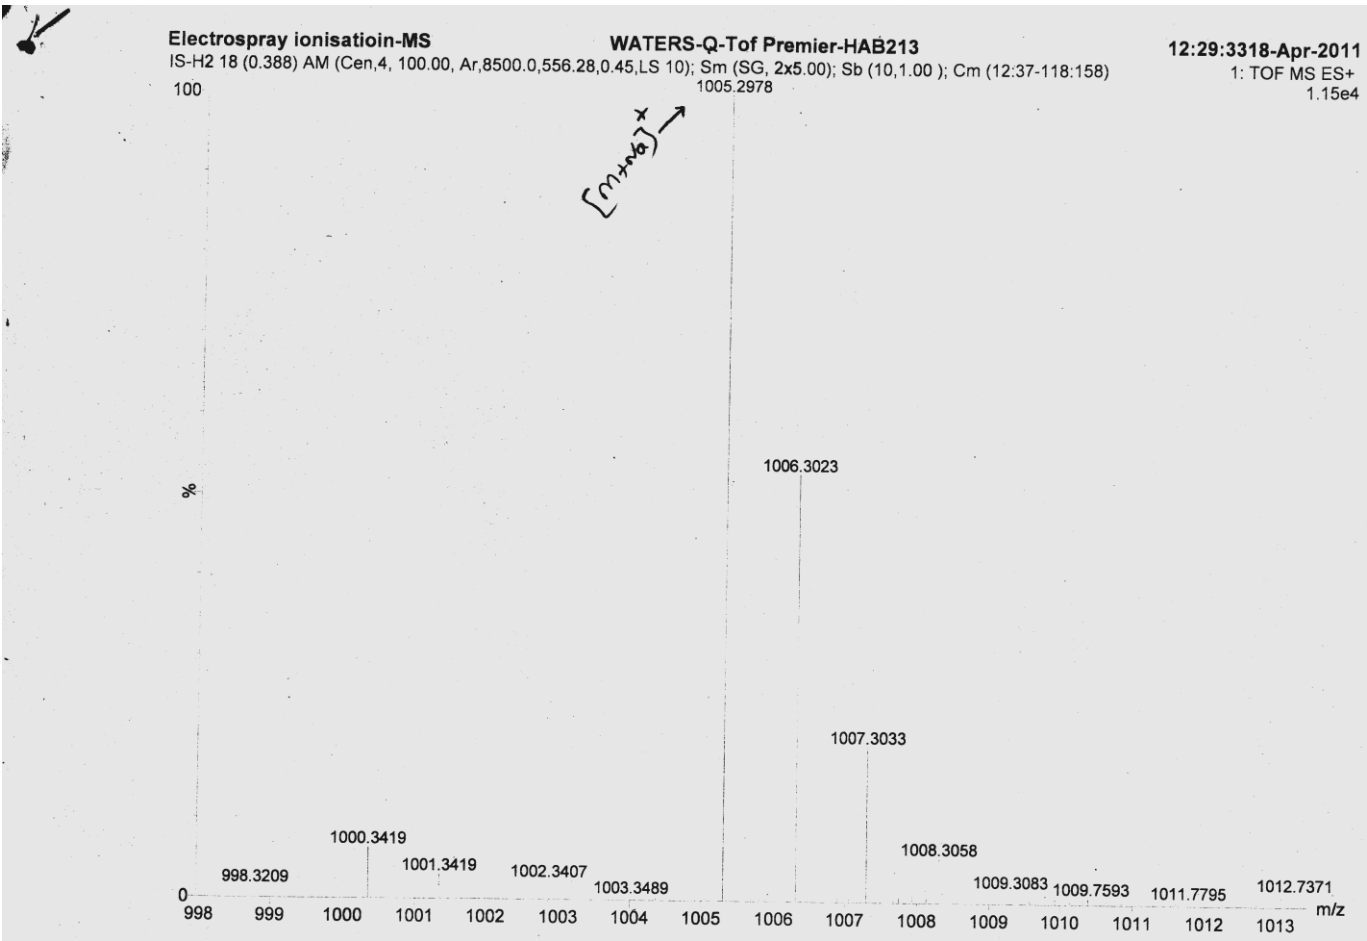

Table 2: Gelation ability of compound 3(a-f)

| Cmpd No | Hexane | Hexane+ ethylacetate | Ethyl acetate | Chloro form | Chloroform + methanol | Methanol | DMSO | DMSO +water | Benzene | Toluene |
|---------|--------|----------------------|---------------|-------------|-----------------------|----------|------|-------------|---------|---------|
| 3a      | NG     | NG                   | NG            | NG          | NG                    | NG       | NG   | NG          | NG      | NG      |
| 3b      | NG     | NG                   | NG            | NG          | NG                    | NG       | NG   | NG          | NG      | NG      |
| 3c      | NG     | G                    | PG            | NG          | NG                    | NG       | NG   | NG          | NG      | NG      |
| 3d      | NG     | G                    | PG            | NG          | NG                    | NG       | NG   | NG          | NG      | NG      |
| 3e      | NG     | NG                   | NG            | NG          | NG                    | NG       | NG   | NG          | NG      | NG      |
| 3f      | NG     | G                    | PG            | NG          | NG                    | NG       | NG   | NG          | NG      | NG      |

G = Gelator; PG = partial gelator; NG = non-gelator

EDAX of compound 3f (before complexation with Hg<sup>2+</sup> ion)

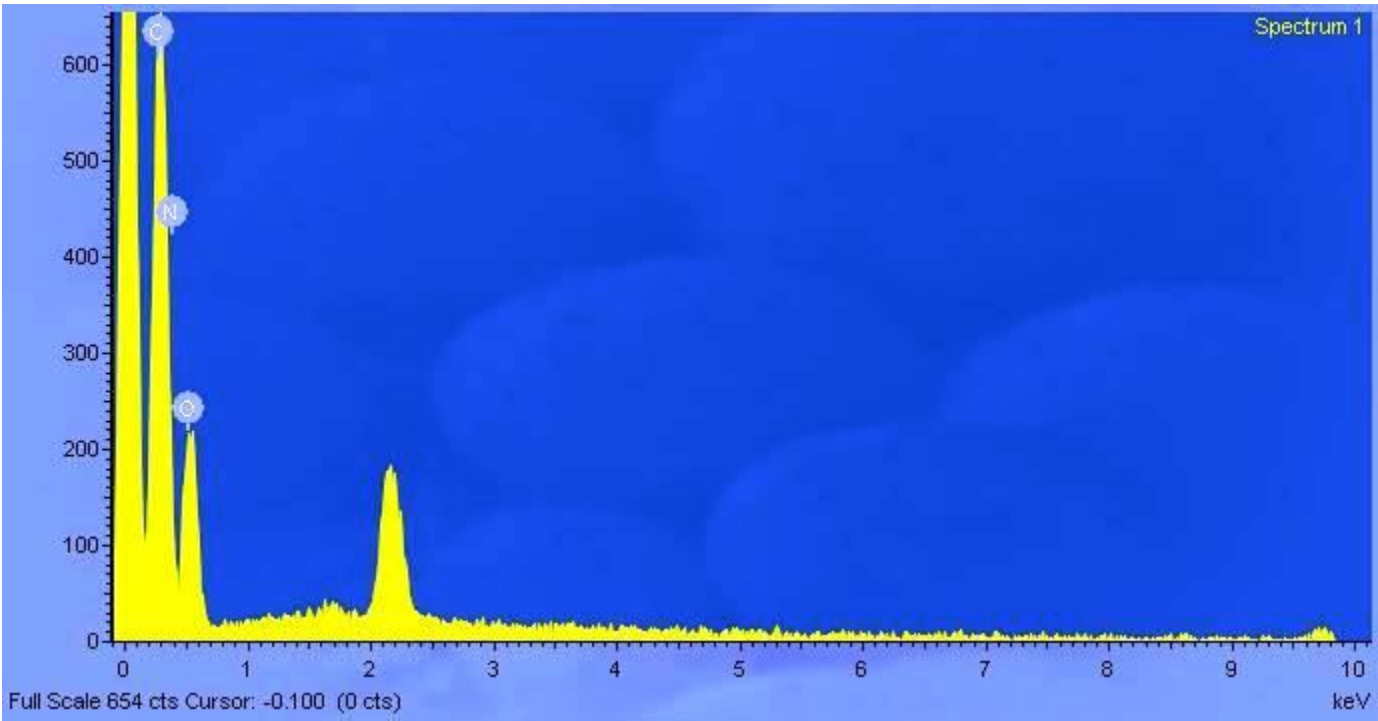

Standard :  
C CaCO3  
N Not defined  
O SiO2

| Element | Weight% | Atomic% |
|---------|---------|---------|
| C K     | 36.02   | 41.18   |
| N K     | 31.95   | 31.32   |
| O K     | 32.03   | 27.49   |
| Totals  | 100.00  |         |

## EDAX of compound 3d

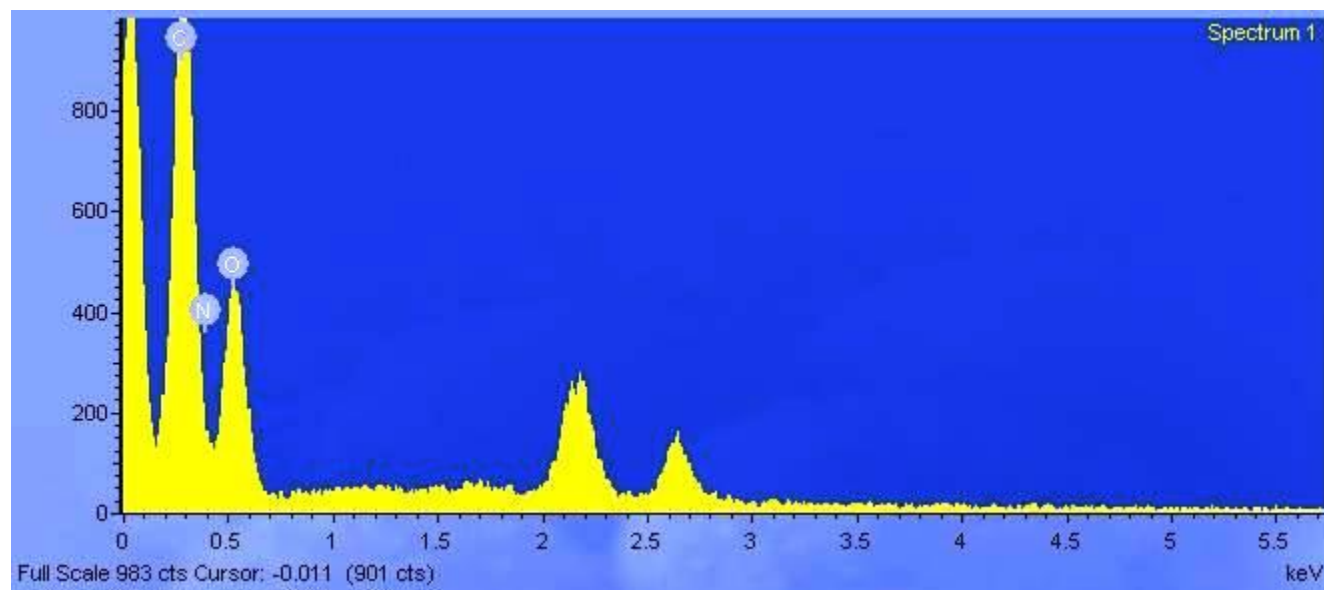

Standard :

C  $\text{CaCO}_3$

N Not defined

O  $\text{SiO}_2$

| Element | Weight% | Atomic% |
|---------|---------|---------|
| C K     | 35.54   | 40.82   |
| N K     | 29.35   | 28.91   |
| O K     | 35.11   | 30.27   |
| Totals  | 100.00  |         |

EDAX of compound 3c

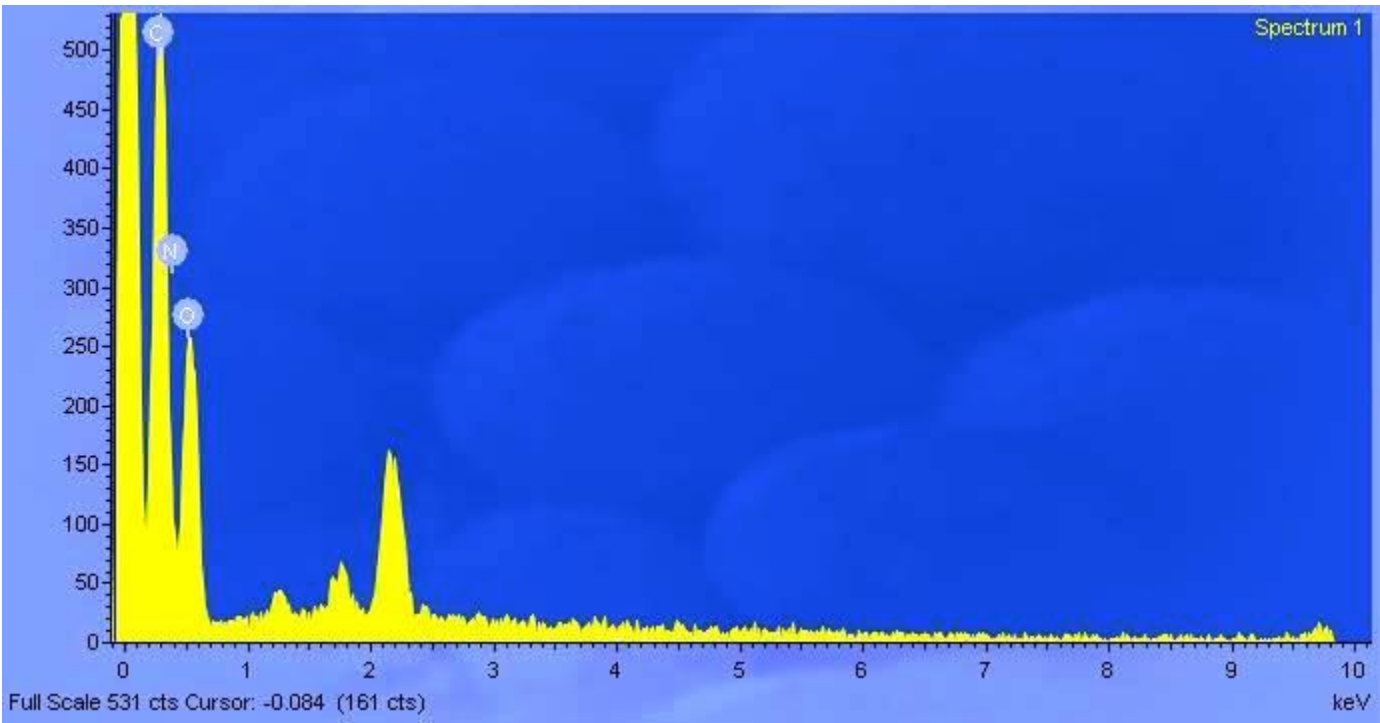

Standard :  
C CaCO3  
N Not defined  
O SiO2

| Element | Weight% | Atomic% |
|---------|---------|---------|
| C K     | 33.24   | 38.43   |
| N K     | 29.35   | 29.10   |
| O K     | 37.41   | 32.47   |
| Totals  | 100.00  |         |

EDAX of compound 3c (after complexation with Hg<sup>2+</sup> ion)

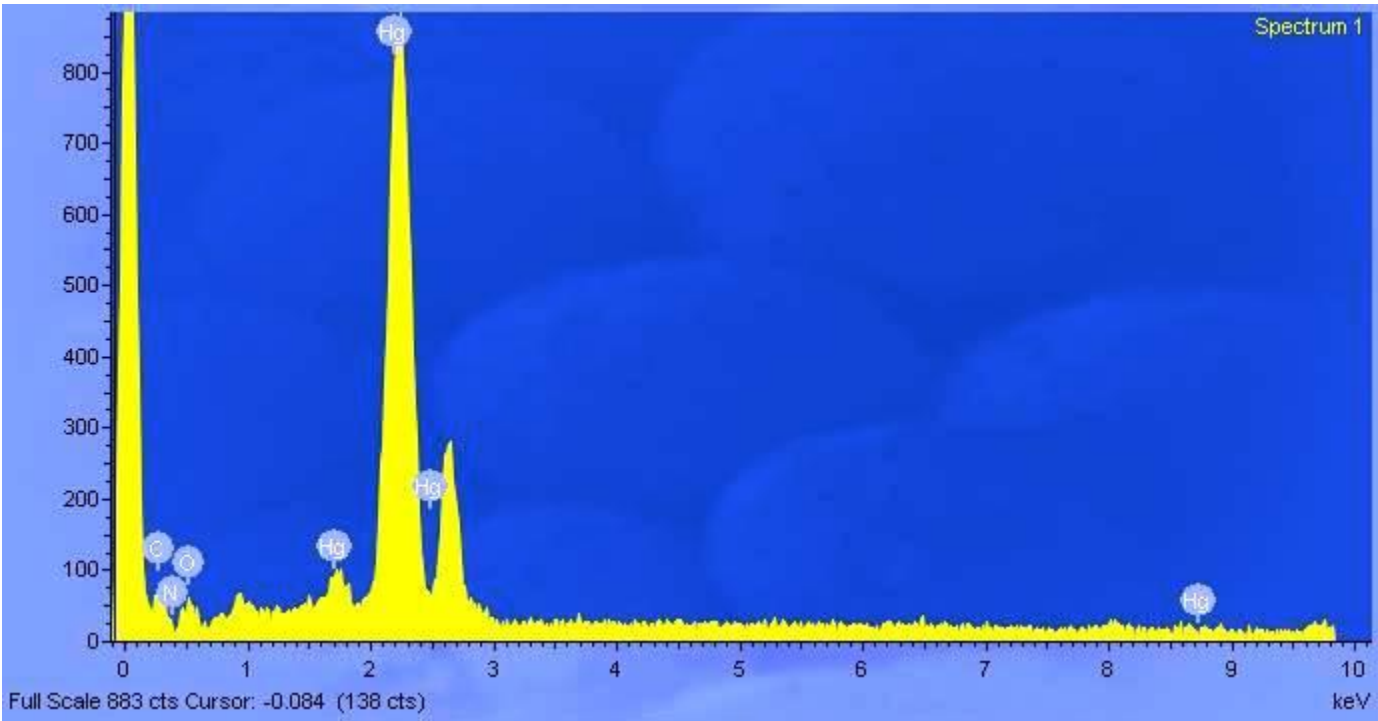

Standard :  
C    CaCO3  
N    Not defined  
O    SiO2  
Hg    HgTe

| Element | Weight% | Atomic% |
|---------|---------|---------|
| C K     | 13.36   | 51.94   |
| N K     | 2.57    | 8.58    |
| O K     | 7.41    | 21.62   |
| Hg M    | 76.67   | 17.85   |
